# Supplementary material
Source: publisher figshare collection journal article supplement (https://acs.figshare.com/ndownloader/files/4601998)
Supplement: Supplementary file 1 [file 4601998]

data_powder
_publ_requested_journal          
'Inorganic Chemistry'
_publ_contact_author_name      
'Robert Podgajny, Dawid Pinkowicz'
_publ_contact_author_address     
;Jagielonian University
Faculty of Chemistry
Ingardena 3
30-060 Krakow
Poland
;
_publ_contact_author_email       
'podgajny@chemia.uj.edu.pl, pinkowic@chemia.uj.edu.pl'

_publ_section_title
;
Reversible Guest-Switchable 3D Ferrimagnet Based on [Nb(CN)8]4-
with Tc = 62 K
;
loop_
_publ_author_name
_publ_author_address
'Pinkowicz, Dawid'
;Jagielonian University
Faculty of Chemistry
Ingardena 3
30-060 Krakow
Poland
;
'Podgajny, Robert'
;Jagielonian University
Faculty of Chemistry
Ingardena 3
30-060 Krakow
Poland
;
'Balanda, Maria'
;'H. Niewodniczanski Institute of Nuclear Physics PAN,
 Radzikowskiego 152, 31-342 Krakow, Poland'
;
'Magdalena Makarewicz'
;'H. Niewodniczanski Institute of Nuclear Physics PAN,
 Radzikowskiego 152, 31-342 Krakow, Poland'
;
'Gawel, Bartlomiej'
;Jagielonian University
Faculty of Chemistry
Ingardena 3
30-060 Krakow
Poland
;
'Lasocha, Wieslaw'
;Jagielonian University
Faculty of Chemistry
Ingardena 3
30-060 Krakow
Poland
;
'Sieklucka, Barbara'
;Jagielonian University
Faculty of Chemistry
Ingardena 3
30-060 Krakow
Poland
;

#==============================================================# CHEMICAL DATA

_chemical_name_systematic        ?
_chemical_name_common            ?
_chemical_formula_moiety         
'{Mn(imidazole)}2, {[Nb(IV)(CN)8]'
_chemical_formula_structural     ?
_chemical_formula_analytical     ?
_chemical_formula_iupac          ?
_chemical_formula_sum            'C14 Mn2 N12 Nb1'
_chemical_formula_weight         539
_chemical_melting_point          ?
_chemical_compound_source        ?

#===========================================# POWDER SPECIMEN AND CRYSTAL DATA

_symmetry_cell_setting                   triclinic
_symmetry_space_group_name_H-M           'P -1'
_symmetry_space_group_name_Hall          '-P 1'
loop_
 _symmetry_equiv_pos_site_id                                 
 _symmetry_equiv_pos_as_xyz                                  
 1   x,y,z
 2   -x,-y,-z
_cell_length_a                           10.1272(2)        
_cell_length_b                           10.9746(2)        
_cell_length_c                           9.9608(2)         
_cell_angle_alpha                        104.077(2)       
_cell_angle_beta                         103.004(3)       
_cell_angle_gamma                        95.874(2)        
_cell_volume                             1031.73(2)       
_cell_formula_units_Z                    2
_cell_measurement_temperature    ?
_pd_calibration_special_details  
; ?
;
_cell_special_details            
; ?
;

_exptl_crystal_density_diffrn            1.7345         
_exptl_crystal_density_meas              ?              
_exptl_crystal_density_method            ?              
_exptl_crystal_F_000                     518            

_pd_spec_size_axial                      ?
_pd_spec_size_equat                      ?
_pd_spec_size_thick                      ?
_pd_spec_mounting                        ?
_pd_spec_mount_mode                      ?
_pd_spec_shape                           ?
_pd_char_particle_morphology             ?
_pd_char_colour                          red
_pd_prep_cool_rate                       ?
_pd_prep_pressure                        ?
_pd_prep_temperature                     ?

_exptl_absorpt_coefficient_mu            14.507         
_exptl_absorpt_correction_type           ?
_exptl_absorpt_process_details           '(Jana2000; Petricek and Dusek, 2000)'
_exptl_absorpt_correction_T_min          ?              
_exptl_absorpt_correction_T_max          ?  

#==========================================================# EXPERIMENTAL DATA

_exptl_special_details           
; ?
;
_pd_instr_location               
; ?
;

_diffrn_ambient_temperature      273
_diffrn_radiation_probe          x-ray
_diffrn_radiation_type           'Cu K\a'
_diffrn_radiation_wavelength     1.54178
_diffrn_source                   ?
_diffrn_source_type              ?
_diffrn_source_target            ?
_diffrn_radiation_monochromator  ?
_diffrn_measurement_device_type  ?
_diffrn_detector                 ?
_diffrn_detector_type            ?

_pd_meas_scan_method             ?
_pd_meas_special_details         
; ?
;
_pd_meas_number_of_points                3151
_pd_meas_2theta_range_min                7.000
_pd_meas_2theta_range_max                70.000
_pd_meas_2theta_range_inc                0.02

#============================================================# REFINEMENT DATA

_pd_proc_ls_special_details             
; ?
;
_pd_proc_ls_profile_function             'Pseudo-Voigt'
_pd_proc_ls_background_function          ?
_pd_proc_ls_pref_orient_corr             'March & Dollase'
_pd_proc_ls_prof_R_factor                0.0451         
_pd_proc_ls_prof_wR_factor               0.0593         
_pd_proc_ls_prof_wR_expected             0.0186         

_refine_special_details                 
; ?
;

_refine_ls_R_factor_gt                   0.0462         
_refine_ls_wR_factor_gt                  0.0502         
_refine_ls_R_factor_all                  0.0463         
_refine_ls_wR_factor_ref                 0.0502         
_refine_ls_number_parameters             9              
_refine_ls_number_restraints             ?
_refine_ls_number_constraints            ?
_refine_ls_weighting_scheme              sigma          
_refine_ls_weighting_details             ?
_refine_ls_hydrogen_treatment            ?
_refine_ls_shift/su_max                  0.0410         
_refine_ls_shift/su_mean                 0.0185         
_refine_ls_extinction_method             'none'
_refine_ls_extinction_coef               ?

_pd_proc_2theta_range_min                7
_pd_proc_2theta_range_max                70
_pd_proc_2theta_range_inc                0.02
_pd_proc_wavelength                      ?

_pd_block_diffractogram_id               ?

loop_
 _pd_proc_info_excluded_regions                              
 'from 40 to 46.000'
_pd_proc_info_data_reduction             ?

loop_
 _atom_type_symbol                                           
 _atom_type_scat_dispersion_real                             
 _atom_type_scat_dispersion_imag                             
 _atom_type_scat_source                                      
 _atom_type_scat_Cromer_Mann_a1                              
 _atom_type_scat_Cromer_Mann_b1                              
 _atom_type_scat_Cromer_Mann_a2                              
 _atom_type_scat_Cromer_Mann_b2                              
 _atom_type_scat_Cromer_Mann_a3                              
 _atom_type_scat_Cromer_Mann_b3                              
 _atom_type_scat_Cromer_Mann_a4                              
 _atom_type_scat_Cromer_Mann_b4                              
 _atom_type_scat_Cromer_Mann_c                               
 C    0.018   0.009
 'International Tables Vol C Tables  4.2.6.8 and 6.1.1.4'
2.31 20.843901 1.02 10.2075 1.5886 0.5687 0.865 51.651199 0.2156                
 Mn  -0.530   2.805
 'International Tables Vol C Tables  4.2.6.8 and 6.1.1.4'
11.2819 5.3409 7.3573 0.3432 3.0193 17.867399 2.2441 83.754303 1.0896           
 N    0.031   0.018
 'International Tables Vol C Tables  4.2.6.8 and 6.1.1.4'
12.2126 0.0057 3.1322 9.8933 2.0125 28.997499 1.1663 0.5826 -11.529             
 Nb  -0.112   2.483
 'International Tables Vol C Tables  4.2.6.8 and 6.1.1.4'
17.614201 1.18865 12.0144 11.766 4.04183 0.204785 3.53346 69.7957 3.75591       

_computing_data_collection               ?
_computing_cell_refinement               ?
_computing_structure_solution            ?
_computing_structure_refinement         
 '(Jana2000; Petricek and Dusek, 2000)'
_computing_molecular_graphics            ?
_computing_publication_material         
 '(Jana2000; Petricek and Dusek, 2000)'

#==========================# 9. ATOMIC COORDINATES AND DISPLACEMENT PARAMETERS

loop_
 _atom_site_label                                            
 _atom_site_type_symbol                                      
 _atom_site_fract_x                                          
 _atom_site_fract_y                                          
 _atom_site_fract_z                                          
 _atom_site_adp_type                                         
 _atom_site_U_iso_or_equiv                                   
 _atom_site_symmetry_multiplicity                            
 _atom_site_occupancy                                        
 _atom_site_calc_flag                                        
 _atom_site_refinement_flags                                 
 _atom_site_disorder_assembly                                
 _atom_site_disorder_group                                   
  C9 C 0.3732(10) 0.8180(6) 0.9836(8) Uiso 0.0127 2 1 d . . .
  C10 C 0.3749(10) 0.8827(6) 1.1127(8) Uiso 0.0127 2 1 d . . .
  N9 N 0.316(1) 0.9862(6) 1.0955(8) Uiso 0.0127 2 1 d . . .
  C11 C 0.2853(10) 0.9772(6) 0.9557(8) Uiso 0.0127 2 1 d . . .
  N10 N 0.317(1) 0.8750(6) 0.8832(8) Uiso 0.0127 2 1 d . . .
  Mn1 Mn 0.2913(10) 0.8091(6) 0.6528(8) Uiso 0.006(2) 2 1 d . . .
  C12 C 0.9288(10) 0.3582(8) 1.0615(10) Uiso 0.0077 2 1 d . . .
  C13 C 0.9796(10) 0.253(8) 1.0549(10) Uiso 0.0127 2 1 d . . .
  N11 N 0.9522(10) 0.1932(8) 0.9127(10) Uiso 0.0127 2 1 d . . .
  C14 C 0.8843(10) 0.2667(8) 0.8431(10) Uiso 0.0127 2 1 d . . .
  N12 N 0.8686(10) 0.3691(8) 0.9301(10) Uiso 0.0127 2 1 d . . .
  Mn2 Mn 0.7681(10) 0.5236(8) 0.882(1) Uiso 0.036(4) 2 1 d . . .
  C1 C 0.3026(5) 0.1168(3) 0.6455(5) Uiso 0.19 2 1 d . . .
  Nb1 Nb 0.2651(5) 0.2884(3) 0.5661(5) Uani 0.071(4) 2 1 d . . .
  C2 C 0.2844(5) 0.4987(3) 0.6239(5) Uiso 0.0127 2 1 d . . .
  N1 N 0.3002(5) 0.6070(3) 0.6514(5) Uiso 0.0127 2 1 d . . .
  N2 N 0.3260(5) 0.0326(3) 0.6892(5) Uiso 0.0127 2 1 d . . .
  C3 C 0.1720(5) 0.1131(3) 0.3792(5) Uiso 0.0127 2 1 d . . .
  N3 N 0.1230(5) 0.0263(3) 0.2837(5) Uiso 0.0127 2 1 d . . .
  C4 C 0.4591(5) 0.3582(3) 0.7388(5) Uiso 0.0127 2 1 d . . .
  N4 N 0.5594(5) 0.3988(3) 0.8262(5) Uiso 0.0127 2 1 d . . .
  C5 C 0.2042(5) 0.3300(3) 0.7739(5) Uiso 0.0127 2 1 d . . .
  N5 N 0.1650(5) 0.3524(3) 0.8750(5) Uiso 0.0127 2 1 d . . .
  C6 C 0.4369(5) 0.2558(3) 0.4637(5) Uiso 0.0127 2 1 d . . .
  N6 N 0.5269(5) 0.2395(3) 0.4142(5) Uiso 0.0127 2 1 d . . .
  C7 C 0.0346(5) 0.2782(3) 0.5274(5) Uiso 0.0127 2 1 d . . .
  N7 N -0.0811(5) 0.2750(3) 0.5120(5) Uiso 0.0127 2 1 d . . .
  C8 C 0.2016(5) 0.3530(3) 0.3674(5) Uiso 0.0127 2 1 d . . .
  N8 N 0.1694(5) 0.3931(3) 0.2714(5) Uiso 0.0127 2 1 d . . .

#================================================# 10. MOLECULAR GEOMETRY

loop_
 _geom_bond_atom_site_label_1                                
 _geom_bond_atom_site_label_2                                
 _geom_bond_site_symmetry_1                                  
 _geom_bond_site_symmetry_2                                  
 _geom_bond_distance                                         
 _geom_bond_publ_flag                                        
W1 C1 . . 2.166(16) yes
W1 C1 . 2_555 2.166(16) yes
W1 C1 . 3_555 2.166(16) yes
W1 C1 . 4_555 2.166(16) yes
W1 C2 . . 2.183(11) yes
W1 C2 . 2_555 2.183(11) yes
W1 C2 . 3_555 2.183(11) yes
W1 C2 . 4_555 2.183(11) yes
W1 C3 . . 2.144(17) yes
Cu1 N1 . . 1.953(15) yes
Cu1 N1 . 2_555 1.953(15) yes
Cu1 N1 . 3_555 1.953(15) yes
Cu1 N1 . 4_555 1.953(15) yes
Cu1 N3 . . 2.18(2) yes
Cu2 Cu2 . 9_565 1.27(12) yes
Cu2 N2 . . 2.01(3) yes
Cu2 N2 . 9_565 2.01(3) yes
Cu2 N2 . 3_565 2.01(3) yes
Cu2 N2 . 11_555 2.01(3) yes
N1 N1 . 2_555 2.718(18) yes
N1 N1 . 4_555 2.718(18) yes
N1 C1 . 25_455 1.16(2) yes
N2 N2 . 3_565 2.698(14) yes
N2 N2 . 11_555 2.692(16) yes
N2 C2 . . 1.150(15) yes
N2 C2 . 2_555 2.843(10) yes
N2 C2 . 4_555 2.843(10) yes
N3 C3 . . 1.15(2) yes
C1 C1 . 2_555 2.965(17) yes
C1 C1 . 4_555 2.965(17) yes
C1 C2 . . 2.62(4) yes
C1 C2 . 2_555 2.62(4) yes
C1 C3 . . 2.64(3) yes
C2 C2 . 2_555 2.085(10) yes
C2 C2 . 3_555 2.948(14) yes
C2 C2 . 4_555 2.085(10) yes

loop_
 _geom_angle_atom_site_label_1                               
 _geom_angle_atom_site_label_2                               
 _geom_angle_atom_site_label_3                               
 _geom_angle_site_symmetry_1                                 
 _geom_angle_site_symmetry_2                                 
 _geom_angle_site_symmetry_3                                 
 _geom_angle                                                 
 _geom_angle_publ_flag                                       
C10 C9 N9 . . . 38.3(5) yes
C10 C9 C11 . . . 75.4(5) yes
C10 C9 N10 . . . 112.3(7) yes
N9 C9 C11 . . . 37.0(3) yes
N9 C9 N10 . . . 73.9(5) yes
C11 C9 N10 . . . 36.9(4) yes
C9 C10 N9 . . . 105.1(7) yes
C9 C10 C11 . . . 68.9(5) yes
C9 C10 N10 . . . 34.5(5) yes
N9 C10 C11 . . . 36.3(4) yes
N9 C10 N10 . . . 70.6(5) yes
C11 C10 N10 . . . 34.3(3) yes
C9 N9 C10 . . . 36.5(4) yes
C9 N9 C11 . . . 70.1(5) yes
C9 N9 N10 . . . 36.7(3) yes
C10 N9 C11 . . . 106.6(7) yes
C10 N9 N10 . . . 73.2(5) yes
C11 N9 N10 . . . 33.4(4) yes
C9 C11 C10 . . . 35.8(3) yes
C9 C11 N9 . . . 72.9(5) yes
C9 C11 N10 . . . 39.0(5) yes
C9 C11 N2 . . 1_565 109.5(4) yes
C10 C11 N9 . . . 37.1(4) yes
C10 C11 N10 . . . 74.8(5) yes
C10 C11 N2 . . 1_565 140.1(5) yes
N9 C11 N10 . . . 111.9(8) yes
N9 C11 N2 . . 1_565 156.1(6) yes
N10 C11 N2 . . 1_565 74.2(5) yes
C9 N10 C10 . . . 33.2(4) yes
C9 N10 N9 . . . 69.4(5) yes
C9 N10 C11 . . . 104.0(7) yes
C9 N10 Mn1 . . . 127.3(6) yes
C9 N10 N2 . . 1_565 154.5(7) yes
C10 N10 N9 . . . 36.2(3) yes
C10 N10 C11 . . . 70.9(5) yes
C10 N10 Mn1 . . . 160.5(5) yes
C10 N10 N2 . . 1_565 141.9(3) yes
N9 N10 C11 . . . 34.7(5) yes
N9 N10 Mn1 . . . 163.3(5) yes
N9 N10 N2 . . 1_565 112.0(3) yes
C11 N10 Mn1 . . . 128.6(7) yes
C11 N10 N2 . . 1_565 80.5(5) yes
Mn1 N10 N2 . . 1_565 53.2(3) yes
N10 Mn1 N1 . . . 94.4(4) yes
N10 Mn1 N2 . . 1_565 79.1(3) yes
N10 Mn1 N6 . . 2_666 116.0(5) yes
N10 Mn1 N7 . . 2_566 123.9(6) yes
N1 Mn1 N2 . . 1_565 168.2(4) yes
N1 Mn1 N6 . . 2_666 72.8(3) yes
N1 Mn1 N7 . . 2_566 83.8(3) yes
N2 Mn1 N6 1_565 . 2_666 101.1(4) yes
N2 Mn1 N7 1_565 . 2_566 107.9(4) yes
N6 Mn1 N7 2_666 . 2_566 116.7(4) yes
C13 C12 N11 . . . 38.4(6) yes
C13 C12 C14 . . . 75.3(6) yes
C13 C12 N12 . . . 112.0(8) yes
C13 C12 N8 . . 1_656 68.5(10) yes
N11 C12 C14 . . . 36.9(4) yes
N11 C12 N12 . . . 73.6(6) yes
N11 C12 N8 . . 1_656 100.2(5) yes
C14 C12 N12 . . . 36.8(5) yes
C14 C12 N8 . . 1_656 129.5(5) yes
N12 C12 N8 . . 1_656 146.7(8) yes
C12 C13 N11 . . . 105(4) yes
C12 C13 C14 . . . 69(2) yes
C12 C13 N12 . . . 34.7(13) yes
C12 C13 N8 . . 1_656 83(3) yes
N11 C13 C14 . . . 36.0(14) yes
N11 C13 N12 . . . 70(2) yes
N11 C13 N8 . . 1_656 143.3(13) yes
C14 C13 N12 . . . 34.4(9) yes
C14 C13 N8 . . 1_656 135(4) yes
N12 C13 N8 . . 1_656 111(3) yes
C12 N11 C13 . . . 36(3) yes
C12 N11 C14 . . . 70.5(6) yes
C12 N11 N12 . . . 36.8(4) yes
C12 N11 N3 . . 2_656 157.5(6) yes
C12 N11 N5 . . 1_655 84.8(4) yes
C13 N11 C14 . . . 107(3) yes
C13 N11 N12 . . . 73(3) yes
C13 N11 N3 . . 2_656 146(4) yes
C13 N11 N5 . . 1_655 93(2) yes
C14 N11 N12 . . . 33.6(5) yes
C14 N11 N3 . . 2_656 100.0(5) yes
C14 N11 N5 . . 1_655 77.7(6) yes
N12 N11 N3 . . 2_656 131.0(5) yes
N12 N11 N5 . . 1_655 78.9(4) yes
N3 N11 N5 2_656 . 1_655 113.8(4) yes
C12 C14 C13 . . . 36(2) yes
C12 C14 N11 . . . 72.7(6) yes
C12 C14 N12 . . . 38.9(6) yes
C12 C14 N5 . . 1_655 84.4(4) yes
C13 C14 N11 . . . 37(2) yes
C13 C14 N12 . . . 74(2) yes
C13 C14 N5 . . 1_655 77.5(8) yes
N11 C14 N12 . . . 111.6(9) yes
N11 C14 N5 . . 1_655 74.8(6) yes
N12 C14 N5 . . 1_655 94.0(6) yes
C12 N12 C13 . . . 33.2(12) yes
C12 N12 N11 . . . 69.6(6) yes
C12 N12 C14 . . . 104.4(9) yes
C12 N12 Mn2 . . . 126.8(7) yes
C13 N12 N11 . . . 36.3(12) yes
C13 N12 C14 . . . 71.1(13) yes
C13 N12 Mn2 . . . 160.0(12) yes
N11 N12 C14 . . . 34.8(6) yes
N11 N12 Mn2 . . . 163.6(6) yes
C14 N12 Mn2 . . . 128.8(8) yes
N12 Mn2 N4 . . . 90.3(4) yes
N12 Mn2 N5 . . 2_667 93.0(4) yes
N12 Mn2 N8 . . 2_666 116.7(6) yes
N4 Mn2 N5 . . 2_667 112.0(5) yes
N4 Mn2 N8 . . 2_666 120.8(4) yes
N5 Mn2 N8 2_667 . 2_666 117.3(4) yes
Nb1 C1 N2 . . . 177.4(4) yes
Nb1 C1 C3 . . . 54.17(16) yes
Nb1 C1 C4 . . . 51.24(15) yes
Nb1 C1 C5 . . . 52.01(19) yes
N2 C1 C3 . . . 128.0(3) yes
N2 C1 C4 . . . 126.2(3) yes
N2 C1 C5 . . . 127.4(4) yes
C3 C1 C4 . . . 100.63(19) yes
C3 C1 C5 . . . 94.49(19) yes
C4 C1 C5 . . . 57.73(16) yes
C1 Nb1 C2 . . . 146.0(3) yes
C1 Nb1 C3 . . . 72.59(18) yes
C1 Nb1 C4 . . . 76.7(2) yes
C1 Nb1 C5 . . . 76.2(2) yes
C1 Nb1 C6 . . . 87.2(2) yes
C1 Nb1 C7 . . . 102.7(2) yes
C1 Nb1 C8 . . . 143.4(2) yes
C2 Nb1 C3 . . . 141.2(3) yes
C2 Nb1 C4 . . . 75.01(18) yes
C2 Nb1 C5 . . . 78.1(2) yes
C2 Nb1 C6 . . . 102.1(3) yes
C2 Nb1 C7 . . . 88.2(2) yes
C2 Nb1 C8 . . . 70.25(19) yes
C3 Nb1 C4 . . . 137.8(3) yes
C3 Nb1 C5 . . . 124.4(3) yes
C3 Nb1 C6 . . . 77.0(2) yes
C3 Nb1 C7 . . . 74.5(2) yes
C3 Nb1 C8 . . . 71.89(19) yes
C4 Nb1 C5 . . . 73.5(2) yes
C4 Nb1 C6 . . . 73.3(2) yes
C4 Nb1 C7 . . . 141.3(3) yes
C4 Nb1 C8 . . . 127.3(3) yes
C5 Nb1 C6 . . . 145.5(3) yes
C5 Nb1 C7 . . . 69.0(2) yes
C5 Nb1 C8 . . . 132.8(3) yes
C6 Nb1 C7 . . . 145.2(3) yes
C6 Nb1 C8 . . . 76.7(3) yes
C7 Nb1 C8 . . . 75.8(2) yes
Nb1 C2 N1 . . . 176.6(5) yes
Nb1 C2 C4 . . . 52.59(16) yes
Nb1 C2 C5 . . . 51.53(19) yes
Nb1 C2 C8 . . . 55.43(17) yes
N1 C2 C4 . . . 125.8(4) yes
N1 C2 C5 . . . 131.0(4) yes
N1 C2 C8 . . . 123.7(4) yes
C4 C2 C5 . . . 58.04(18) yes
C4 C2 C8 . . . 98.85(18) yes
C5 C2 C8 . . . 99.87(16) yes
Mn1 N1 C2 . . . 165.5(4) yes
Mn1 N1 N6 . . 2_666 52.6(3) yes
C2 N1 N6 . . 2_666 128.7(5) yes
C11 N2 N10 1_545 . 1_545 25.4(2) yes
C11 N2 Mn1 1_545 . 1_545 71.4(3) yes
C11 N2 C1 1_545 . . 129.7(4) yes
N10 N2 Mn1 1_545 . 1_545 47.6(2) yes
N10 N2 C1 1_545 . . 154.4(5) yes
Mn1 N2 C1 1_545 . . 148.0(4) yes
C1 C3 Nb1 . . . 53.24(16) yes
C1 C3 N3 . . . 128.1(4) yes
C1 C3 C6 . . . 68.54(18) yes
C1 C3 C7 . . . 80.97(19) yes
C1 C3 C8 . . . 106.36(16) yes
Nb1 C3 N3 . . . 178.5(4) yes
Nb1 C3 C6 . . . 50.73(18) yes
Nb1 C3 C7 . . . 52.53(18) yes
Nb1 C3 C8 . . . 53.57(17) yes
N3 C3 C6 . . . 129.9(5) yes
N3 C3 C7 . . . 126.3(4) yes
N3 C3 C8 . . . 125.2(4) yes
C6 C3 C7 . . . 101.04(16) yes
C6 C3 C8 . . . 61.08(16) yes
C7 C3 C8 . . . 61.66(17) yes
N11 N3 C3 2_656 . . 169.2(4) yes
C1 C4 Nb1 . . . 52.06(16) yes
C1 C4 C2 . . . 102.46(19) yes
C1 C4 N4 . . . 130.8(3) yes
C1 C4 C5 . . . 61.19(16) yes
C1 C4 C6 . . . 69.27(16) yes
Nb1 C4 C2 . . . 52.40(15) yes
Nb1 C4 N4 . . . 177.2(4) yes
Nb1 C4 C5 . . . 53.8(2) yes
Nb1 C4 C6 . . . 53.4(2) yes
C2 C4 N4 . . . 125.0(3) yes
C2 C4 C5 . . . 63.10(18) yes
C2 C4 C6 . . . 80.32(19) yes
N4 C4 C5 . . . 127.0(5) yes
N4 C4 C6 . . . 126.2(5) yes
C5 C4 C6 . . . 106.6(2) yes
Mn2 N4 C4 . . . 144.2(5) yes
C1 C5 Nb1 . . . 51.83(17) yes
C1 C5 C2 . . . 99.5(2) yes
C1 C5 C4 . . . 61.09(16) yes
C1 C5 N5 . . . 130.7(3) yes
C1 C5 C7 . . . 82.56(17) yes
Nb1 C5 C2 . . . 50.37(16) yes
Nb1 C5 C4 . . . 52.70(19) yes
Nb1 C5 N5 . . . 175.5(4) yes
Nb1 C5 C7 . . . 55.7(2) yes
C2 C5 C4 . . . 58.86(17) yes
C2 C5 N5 . . . 128.5(3) yes
C2 C5 C7 . . . 70.73(18) yes
C4 C5 N5 . . . 131.3(4) yes
C4 C5 C7 . . . 107.8(2) yes
N5 C5 C7 . . . 120.0(4) yes
N11 N5 C14 1_455 . 1_455 27.5(3) yes
N11 N5 Mn2 1_455 . 2_667 94.1(4) yes
N11 N5 C5 1_455 . . 122.5(3) yes
C14 N5 Mn2 1_455 . 2_667 100.7(4) yes
C14 N5 C5 1_455 . . 117.1(4) yes
Mn2 N5 C5 2_667 . . 141.5(4) yes
Nb1 C6 C3 . . . 52.31(16) yes
Nb1 C6 C4 . . . 53.32(19) yes
Nb1 C6 N6 . . . 178.5(4) yes
Nb1 C6 C8 . . . 52.01(19) yes
C3 C6 C4 . . . 100.5(2) yes
C3 C6 N6 . . . 128.8(3) yes
C3 C6 C8 . . . 56.86(15) yes
C4 C6 N6 . . . 125.2(4) yes
C4 C6 C8 . . . 95.1(2) yes
N6 C6 C8 . . . 129.3(4) yes
Mn1 N6 N1 2_666 . 2_666 54.6(2) yes
Mn1 N6 C6 2_666 . . 170.1(5) yes
N1 N6 C6 2_666 . . 132.3(3) yes
Nb1 C7 C3 . . . 52.93(16) yes
Nb1 C7 C5 . . . 55.3(2) yes
Nb1 C7 N7 . . . 178.0(4) yes
Nb1 C7 C8 . . . 51.9(2) yes
C3 C7 C5 . . . 98.0(2) yes
C3 C7 N7 . . . 128.9(3) yes
C3 C7 C8 . . . 57.52(16) yes
C5 C7 N7 . . . 122.7(4) yes
C5 C7 C8 . . . 101.4(2) yes
N7 C7 C8 . . . 129.4(4) yes
Mn1 N7 C7 2_566 . . 142.6(5) yes
Nb1 C8 C2 . . . 54.31(16) yes
Nb1 C8 C3 . . . 54.53(15) yes
Nb1 C8 C6 . . . 51.3(2) yes
Nb1 C8 C7 . . . 52.4(2) yes
Nb1 C8 N8 . . . 175.8(3) yes
C2 C8 C3 . . . 108.4(2) yes
C2 C8 C6 . . . 80.45(18) yes
C2 C8 C7 . . . 71.34(19) yes
C2 C8 N8 . . . 121.6(3) yes
C3 C8 C6 . . . 62.06(16) yes
C3 C8 C7 . . . 60.83(17) yes
C3 C8 N8 . . . 129.4(3) yes
C6 C8 C7 . . . 101.1(2) yes
C6 C8 N8 . . . 130.6(5) yes
C7 C8 N8 . . . 127.0(4) yes
C12 N8 C13 1_454 . 1_454 28.1(17) yes
C12 N8 Mn2 1_454 . 2_666 76.8(4) yes
C12 N8 C8 1_454 . . 133.8(4) yes
C13 N8 Mn2 1_454 . 2_666 84.6(12) yes
C13 N8 C8 1_454 . . 117.3(17) yes
Mn2 N8 C8 2_666 . . 147.5(5) yes


#=====================================================#  POWDER PROFILE

loop_
 _pd_proc_point_id                                           
 _pd_proc_2theta_corrected                                   
 _pd_proc_intensity_net                                      
 _pd_calc_intensity_net                                      
 _pd_proc_ls_weight                                          
         1         0.0621        2852.00        2972.38          53.40
         2         0.0625        2873.00        2955.49          53.60
         3         0.0628        2873.00        2939.08          53.60
         4         0.0632        2756.00        2923.15          52.50
         5         0.0635        2820.00        2907.67          53.10
         6         0.0638        2704.00        2892.65          52.00
         7         0.0642        2767.00        2878.07          52.60
         8         0.0645        2704.00        2863.92          52.00
         9         0.0649        2673.00        2850.19          51.70
        10         0.0652        2798.00        2836.87          52.90
        11         0.0655        2767.00        2823.96          52.60
        12         0.0659        2735.00        2811.43          52.30
        13         0.0662        2756.00        2799.29          52.50
        14         0.0666        2767.00        2787.52          52.60
        15         0.0669        2735.00        2776.11          52.30
        16         0.0672        2694.00        2765.06          51.90
        17         0.0676        2735.00        2754.36          52.30
        18         0.0679        2746.00        2743.99          52.40
        19         0.0683        2735.00        2733.95          52.30
        20         0.0686        2642.00        2724.23          51.40
        21         0.0689        2663.00        2714.83          51.60
        22         0.0693        2683.00        2705.73          51.80
        23         0.0696        2642.00        2696.93          51.40
        24         0.0699        2673.00        2688.41          51.70
        25         0.0703        2683.00        2680.18          51.80
        26         0.0706        2841.00        2672.23          53.30
        27         0.0710        2683.00        2664.53          51.80
        28         0.0713        2704.00        2657.10          52.00
        29         0.0716        2714.00        2649.93          52.10
        30         0.0720        2694.00        2642.99          51.90
        31         0.0723        2673.00        2636.30          51.70
        32         0.0727        2735.00        2634.80          52.30
        33         0.0730        2652.00        2631.30          51.50
        34         0.0733        2663.00        2625.72          51.60
        35         0.0737        2725.00        2620.40          52.20
        36         0.0740        2663.00        2615.33          51.60
        37         0.0743        2663.00        2610.51          51.60
        38         0.0747        2663.00        2605.94          51.60
        39         0.0750        2683.00        2601.63          51.80
        40         0.0754        2632.00        2597.57          51.30
        41         0.0757        2601.00        2593.76          51.00
        42         0.0760        2663.00        2590.23          51.60
        43         0.0764        2683.00        2586.97          51.80
        44         0.0767        2652.00        2584.00          51.50
        45         0.0770        2591.00        2581.33          50.90
        46         0.0774        2570.00        2578.98          50.70
        47         0.0777        2621.00        2576.99          51.20
        48         0.0781        2560.00        2575.38          50.60
        49         0.0784        2570.00        2574.19          50.70
        50         0.0787        2642.00        2573.49          51.40
        51         0.0791        2581.00        2573.35          50.80
        52         0.0794        2611.00        2573.87          51.10
        53         0.0797        2621.00        2575.19          51.20
        54         0.0801        2621.00        2577.49          51.20
        55         0.0804        2611.00        2580.98          51.10
        56         0.0808        2632.00        2585.94          51.30
        57         0.0811        2694.00        2592.68          51.90
        58         0.0814        2714.00        2601.73          52.10
        59         0.0818        2820.00        2614.34          53.10
        60         0.0821        2830.00        2634.13          53.20
        61         0.0824        2927.00        2670.23          54.10
        62         0.0828        3069.00        2740.57          55.40
        63         0.0831        3306.00        2872.73          57.50
        64         0.0835        3469.00        3102.70          58.90
        65         0.0838        3745.00        3481.88          61.20
        66         0.0841        4186.00        4092.49          64.70
        67         0.0845        4679.00        5019.17          68.40
        68         0.0848        5476.00        6205.82          74.00
        69         0.0851        6561.00        7280.35          81.00
        70         0.0855        7327.00        7698.45          85.60
        71         0.0858        7327.00        7222.97          85.60
        72         0.0862        5852.00        6116.16          76.50
        73         0.0865        4570.00        4871.39          67.60
        74         0.0868        3552.00        3866.29          59.60
        75         0.0872        3036.00        3222.65          55.10
        76         0.0875        2830.00        2876.09          53.20
        77         0.0878        2767.00        2709.45          52.60
        78         0.0882        2663.00        2631.88          51.60
        79         0.0885        2591.00        2593.36          50.90
        80         0.0889        2581.00        2571.37          50.80
        81         0.0892        2570.00        2556.80          50.70
        82         0.0895        2490.00        2550.25          49.90
        83         0.0899        2550.00        2544.01          50.50
        84         0.0902        2510.00        2537.31          50.10
        85         0.0905        2480.00        2531.73          49.80
        86         0.0909        2570.00        2527.02          50.70
        87         0.0912        2540.00        2523.01          50.40
        88         0.0916        2500.00        2519.59          50.00
        89         0.0919        2570.00        2516.67          50.70
        90         0.0922        2550.00        2514.19          50.50
        91         0.0926        2490.00        2512.08          49.90
        92         0.0929        2490.00        2510.31          49.90
        93         0.0932        2450.00        2508.87          49.50
        94         0.0936        2490.00        2507.77          49.90
        95         0.0939        2470.00        2507.03          49.70
        96         0.0942        2500.00        2506.74          50.00
        97         0.0946        2480.00        2506.97          49.80
        98         0.0949        2460.00        2507.90          49.60
        99         0.0953        2500.00        2509.74          50.00
       100         0.0956        2540.00        2512.72          50.40
       101         0.0959        2581.00        2516.71          50.80
       102         0.0963        2601.00        2520.86          51.00
       103         0.0966        2601.00        2523.87          51.00
       104         0.0969        2540.00        2525.05          50.40
       105         0.0973        2601.00        2524.88          51.00
       106         0.0976        2570.00        2519.69          50.70
       107         0.0979        2550.00        2518.28          50.50
       108         0.0983        2642.00        2521.23          51.40
       109         0.0986        2560.00        2526.29          50.60
       110         0.0990        2560.00        2533.61          50.60
       111         0.0993        2510.00        2543.61          50.10
       112         0.0996        2520.00        2557.74          50.20
       113         0.1000        2611.00        2579.62          51.10
       114         0.1003        2632.00        2616.35          51.30
       115         0.1006        2642.00        2679.12          51.40
       116         0.1010        2704.00        2783.25          52.00
       117         0.1013        2841.00        2949.92          53.30
       118         0.1016        3047.00        3210.36          55.20
       119         0.1020        3238.00        3602.03          56.90
       120         0.1023        3528.00        4133.62          59.40
       121         0.1026        3969.00        4713.04          63.00
       122         0.1030        4303.00        5123.80          65.60
       123         0.1033        4706.00        5168.39          68.60
       124         0.1037        4330.00        4835.26          65.80
       125         0.1040        3745.00        4282.20          61.20
       126         0.1043        3272.00        3705.21          57.20
       127         0.1047        2894.00        3236.68          53.80
       128         0.1050        2652.00        2918.44          51.50
       129         0.1053        2570.00        2728.79          50.70
       130         0.1057        2540.00        2624.49          50.40
       131         0.1060        2460.00        2568.15          49.60
       132         0.1063        2421.00        2536.23          49.20
       133         0.1067        2421.00        2516.35          49.20
       134         0.1070        2391.00        2502.61          48.90
       135         0.1073        2411.00        2492.26          49.10
       136         0.1077        2352.00        2483.96          48.50
       137         0.1080        2440.00        2477.02          49.40
       138         0.1084        2362.00        2471.03          48.60
       139         0.1087        2333.00        2465.76          48.30
       140         0.1090        2362.00        2461.04          48.60
       141         0.1094        2352.00        2456.77          48.50
       142         0.1097        2391.00        2452.86          48.90
       143         0.1100        2352.00        2449.25          48.50
       144         0.1104        2294.00        2445.86          47.90
       145         0.1107        2352.00        2442.69          48.50
       146         0.1110        2381.00        2439.71          48.80
       147         0.1114        2372.00        2436.86          48.70
       148         0.1117        2352.00        2434.14          48.50
       149         0.1120        2391.00        2431.51          48.90
       150         0.1124        2450.00        2428.97          49.50
       151         0.1127        2421.00        2426.49          49.20
       152         0.1130        2421.00        2424.29          49.20
       153         0.1134        2372.00        2422.03          48.70
       154         0.1137        2362.00        2419.72          48.60
       155         0.1140        2401.00        2417.45          49.00
       156         0.1144        2372.00        2415.20          48.70
       157         0.1147        2323.00        2412.98          48.20
       158         0.1151        2294.00        2410.77          47.90
       159         0.1154        2314.00        2408.59          48.10
       160         0.1157        2323.00        2406.41          48.20
       161         0.1161        2333.00        2404.25          48.30
       162         0.1164        2362.00        2398.07          48.60
       163         0.1167        2275.00        2394.10          47.70
       164         0.1171        2294.00        2392.23          47.90
       165         0.1174        2362.00        2390.35          48.60
       166         0.1177        2362.00        2388.47          48.60
       167         0.1181        2314.00        2386.57          48.10
       168         0.1184        2362.00        2384.67          48.60
       169         0.1187        2294.00        2382.77          47.90
       170         0.1191        2381.00        2380.87          48.80
       171         0.1194        2323.00        2378.97          48.20
       172         0.1197        2343.00        2377.30          48.40
       173         0.1201        2362.00        2375.44          48.60
       174         0.1204        2352.00        2373.72          48.50
       175         0.1207        2294.00        2371.98          47.90
       176         0.1211        2333.00        2370.23          48.30
       177         0.1214        2362.00        2368.58          48.60
       178         0.1217        2333.00        2367.00          48.30
       179         0.1221        2411.00        2365.60          49.10
       180         0.1224        2285.00        2364.59          47.80
       181         0.1227        2372.00        2364.45          48.70
       182         0.1231        2343.00        2366.07          48.40
       183         0.1234        2401.00        2370.78          49.00
       184         0.1237        2333.00        2380.33          48.30
       185         0.1241        2304.00        2397.04          48.00
       186         0.1244        2430.00        2423.49          49.29
       187         0.1247        2421.00        2459.86          49.20
       188         0.1251        2430.00        2498.52          49.29
       189         0.1254        2540.00        2522.85          50.40
       190         0.1257        2540.00        2519.14          50.40
       191         0.1261        2550.00        2488.33          50.50
       192         0.1264        2421.00        2443.95          49.20
       193         0.1268        2401.00        2401.32          49.00
       194         0.1271        2391.00        2369.24          48.90
       195         0.1274        2352.00        2348.87          48.50
       196         0.1278        2314.00        2337.14          48.10
       197         0.1281        2372.00        2330.40          48.70
       198         0.1284        2266.00        2326.12          47.60
       199         0.1288        2247.00        2322.98          47.40
       200         0.1291        2228.00        2320.39          47.20
       201         0.1294        2256.00        2318.11          47.50
       202         0.1298        2314.00        2316.09          48.10
       203         0.1301        2266.00        2314.34          47.60
       204         0.1304        2362.00        2312.98          48.60
       205         0.1308        2323.00        2312.31          48.20
       206         0.1311        2362.00        2312.83          48.60
       207         0.1314        2343.00        2315.33          48.40
       208         0.1318        2372.00        2320.91          48.70
       209         0.1321        2480.00        2331.03          49.80
       210         0.1324        2500.00        2347.53          50.00
       211         0.1328        2540.00        2371.78          50.40
       212         0.1331        2632.00        2402.16          51.30
       213         0.1334        2642.00        2430.80          51.40
       214         0.1338        2663.00        2445.59          51.60
       215         0.1341        2777.00        2439.03          52.70
       216         0.1344        2632.00        2413.52          51.30
       217         0.1348        2480.00        2378.47          49.80
       218         0.1351        2391.00        2343.81          48.90
       219         0.1354        2218.00        2315.73          47.10
       220         0.1358        2285.00        2295.87          47.80
       221         0.1361        2304.00        2282.93          48.00
       222         0.1364        2266.00        2274.62          47.60
       223         0.1368        2323.00        2268.99          48.20
       224         0.1371        2237.00        2264.78          47.30
       225         0.1374        2266.00        2261.29          47.60
       226         0.1377        2256.00        2258.00          47.50
       227         0.1381        2275.00        2255.04          47.70
       228         0.1384        2304.00        2252.34          48.00
       229         0.1387        2237.00        2249.74          47.30
       230         0.1391        2172.00        2247.22          46.60
       231         0.1394        2256.00        2244.76          47.50
       232         0.1397        2237.00        2242.35          47.30
       233         0.1401        2247.00        2239.99          47.40
       234         0.1404        2190.00        2237.66          46.80
       235         0.1407        2190.00        2235.37          46.80
       236         0.1411        2285.00        2233.10          47.80
       237         0.1414        2256.00        2230.87          47.50
       238         0.1417        2228.00        2228.67          47.20
       239         0.1421        2237.00        2226.49          47.30
       240         0.1424        2153.00        2224.33          46.40
       241         0.1427        2256.00        2222.20          47.50
       242         0.1431        2247.00        2220.09          47.40
       243         0.1434        2228.00        2218.00          47.20
       244         0.1437        2266.00        2215.93          47.60
       245         0.1441        2247.00        2213.88          47.40
       246         0.1444        2285.00        2211.85          47.80
       247         0.1447        2256.00        2209.85          47.50
       248         0.1451        2237.00        2207.87          47.30
       249         0.1454        2237.00        2205.90          47.30
       250         0.1457        2228.00        2203.96          47.20
       251         0.1461        2266.00        2202.03          47.60
       252         0.1464        2228.00        2200.13          47.20
       253         0.1467        2256.00        2198.20          47.50
       254         0.1471        2228.00        2196.32          47.20
       255         0.1474        2266.00        2194.26          47.60
       256         0.1477        2256.00        2192.34          47.50
       257         0.1481        2275.00        2190.56          47.70
       258         0.1484        2181.00        2188.80          46.70
       259         0.1487        2247.00        2187.07          47.40
       260         0.1490        2116.00        2185.35          46.00
       261         0.1494        2228.00        2183.66          47.20
       262         0.1497        2266.00        2181.99          47.60
       263         0.1500        2294.00        2180.34          47.90
       264         0.1504        2134.00        2178.71          46.20
       265         0.1507        2181.00        2177.11          46.70
       266         0.1510        2181.00        2175.53          46.70
       267         0.1514        2237.00        2173.97          47.30
       268         0.1517        2181.00        2172.44          46.70
       269         0.1520        2172.00        2170.93          46.60
       270         0.1524        2247.00        2169.44          47.40
       271         0.1527        2172.00        2167.98          46.60
       272         0.1530        2181.00        2166.54          46.70
       273         0.1534        2218.00        2165.13          47.10
       274         0.1537        2218.00        2163.74          47.10
       275         0.1540        2247.00        2162.37          47.40
       276         0.1544        2172.00        2161.04          46.60
       277         0.1547        2172.00        2164.76          46.60
       278         0.1550        2181.00        2163.74          46.70
       279         0.1553        2190.00        2165.30          46.80
       280         0.1557        2079.00        2164.51          45.60
       281         0.1560        2237.00        2164.26          47.30
       282         0.1563        2200.00        2163.62          46.90
       283         0.1567        2134.00        2163.30          46.20
       284         0.1570        2237.00        2162.83          47.30
       285         0.1573        2190.00        2162.44          46.80
       286         0.1577        2200.00        2162.15          46.90
       287         0.1580        2181.00        2161.97          46.70
       288         0.1583        2209.00        2161.90          47.00
       289         0.1587        2228.00        2161.96          47.20
       290         0.1590        2247.00        2162.16          47.40
       291         0.1593        2228.00        2162.52          47.20
       292         0.1597        2209.00        2163.05          47.00
       293         0.1600        2237.00        2163.80          47.30
       294         0.1603        2218.00        2164.77          47.10
       295         0.1606        2153.00        2166.02          46.40
       296         0.1610        2314.00        2167.58          48.10
       297         0.1613        2153.00        2169.51          46.40
       298         0.1616        2144.00        2171.88          46.30
       299         0.1620        2162.00        2174.79          46.50
       300         0.1623        2256.00        2178.34          47.50
       301         0.1626        2153.00        2182.68          46.40
       302         0.1630        2256.00        2187.98          47.50
       303         0.1633        2285.00        2194.48          47.80
       304         0.1636        2314.00        2202.42          48.10
       305         0.1640        2247.00        2212.14          47.40
       306         0.1643        2304.00        2224.17          48.00
       307         0.1646        2304.00        2239.65          48.00
       308         0.1649        2372.00        2261.13          48.70
       309         0.1653        2381.00        2294.03          48.80
       310         0.1656        2470.00        2348.22          49.70
       311         0.1659        2632.00        2439.06          51.30
       312         0.1663        2809.00        2587.95          53.00
       313         0.1666        2992.00        2822.91          54.70
       314         0.1669        3283.00        3177.07          57.30
       315         0.1673        3721.00        3672.98          61.00
       316         0.1676        4083.00        4277.46          63.90
       317         0.1679        4462.00        4846.64          66.80
       318         0.1682        4747.00        5172.70          68.90
       319         0.1686        4651.00        5136.74          68.20
       320         0.1689        4356.00        4769.14          66.00
       321         0.1692        3906.00        4211.25          62.50
       322         0.1696        3295.00        3627.18          57.40
       323         0.1699        3014.00        3131.17          54.90
       324         0.1702        2798.00        2768.89          52.90
       325         0.1706        2570.00        2533.22          50.70
       326         0.1709        2460.00        2392.03          49.60
       327         0.1712        2421.00        2311.10          49.20
       328         0.1716        2381.00        2264.62          48.80
       329         0.1719        2333.00        2236.59          48.30
       330         0.1722        2314.00        2218.33          48.10
       331         0.1725        2381.00        2205.43          48.80
       332         0.1729        2333.00        2195.75          48.30
       333         0.1732        2323.00        2188.16          48.20
       334         0.1735        2294.00        2182.04          47.90
       335         0.1739        2256.00        2177.03          47.50
       336         0.1742        2266.00        2172.89          47.60
       337         0.1745        2266.00        2169.44          47.60
       338         0.1748        2209.00        2166.57          47.00
       339         0.1752        2200.00        2164.18          46.90
       340         0.1755        2209.00        2162.20          47.00
       341         0.1758        2172.00        2168.98          46.60
       342         0.1762        2285.00        2168.04          47.80
       343         0.1765        2285.00        2194.08          47.80
       344         0.1768        2294.00        2205.71          47.90
       345         0.1772        2237.00        2207.48          47.30
       346         0.1775        2200.00        2209.60          46.90
       347         0.1778        2247.00        2212.10          47.40
       348         0.1781        2256.00        2223.14          47.50
       349         0.1785        2237.00        2226.83          47.30
       350         0.1788        2266.00        2235.04          47.60
       351         0.1791        2190.00        2239.85          46.80
       352         0.1795        2247.00        2245.19          47.40
       353         0.1798        2237.00        2251.11          47.30
       354         0.1801        2247.00        2257.70          47.40
       355         0.1804        2256.00        2265.06          47.50
       356         0.1808        2218.00        2273.38          47.10
       357         0.1811        2362.00        2282.88          48.60
       358         0.1814        2275.00        2288.91          47.70
       359         0.1818        2285.00        2299.02          47.80
       360         0.1821        2352.00        2314.39          48.50
       361         0.1824        2391.00        2332.83          48.90
       362         0.1828        2391.00        2354.17          48.90
       363         0.1831        2470.00        2377.54          49.70
       364         0.1834        2540.00        2401.10          50.40
       365         0.1837        2632.00        2423.42          51.30
       366         0.1841        2540.00        2444.79          50.40
       367         0.1844        2591.00        2467.05          50.90
       368         0.1847        2560.00        2492.82          50.60
       369         0.1851        2510.00        2524.56          50.10
       370         0.1854        2500.00        2564.17          50.00
       371         0.1857        2540.00        2613.07          50.40
       372         0.1860        2480.00        2672.66          49.80
       373         0.1864        2611.00        2744.87          51.10
       374         0.1867        2714.00        2833.36          52.10
       375         0.1870        2841.00        2945.80          53.30
       376         0.1874        3003.00        3097.71          54.80
       377         0.1877        3272.00        3317.60          57.20
       378         0.1880        3660.00        3652.06          60.50
       379         0.1883        4356.00        4170.31          66.00
       380         0.1887        5184.00        4968.71          72.00
       381         0.1890        6577.00        6174.81          81.10
       382         0.1893        8100.00        7935.14          90.00
       383         0.1897       10506.00       10347.00         102.50
       384         0.1900       13271.00       13284.80         115.20
       385         0.1903       16384.00       16208.20         128.00
       386         0.1906       18660.00       18318.90         136.60
       387         0.1910       19404.00       19059.20         139.30
       388         0.1913       18306.00       18281.70         135.30
       389         0.1916       15926.00       16239.10         126.20
       390         0.1920       12905.00       13491.80         113.60
       391         0.1923       10100.00       10634.40         100.50
       392         0.1926        7903.00        8124.77          88.90
       393         0.1929        5991.00        6194.83          77.40
       394         0.1933        4900.00        4860.37          70.00
       395         0.1936        4160.00        4008.77          64.50
       396         0.1939        3636.00        3491.03          60.30
       397         0.1943        3238.00        3178.68          56.90
       398         0.1946        3058.00        2983.64          55.30
       399         0.1949        2938.00        2853.85          54.20
       400         0.1952        2714.00        2761.28          52.10
       401         0.1956        2652.00        2691.35          51.50
       402         0.1959        2642.00        2636.25          51.40
       403         0.1962        2591.00        2591.59          50.90
       404         0.1965        2550.00        2554.66          50.50
       405         0.1969        2530.00        2523.70          50.30
       406         0.1972        2520.00        2497.50          50.20
       407         0.1975        2333.00        2475.11          48.30
       408         0.1979        2470.00        2455.97          49.70
       409         0.1982        2450.00        2439.55          49.50
       410         0.1985        2362.00        2425.40          48.60
       411         0.1988        2275.00        2413.17          47.70
       412         0.1992        2333.00        2402.58          48.30
       413         0.1995        2333.00        2393.41          48.30
       414         0.1998        2256.00        2385.45          47.50
       415         0.2002        2247.00        2378.55          47.40
       416         0.2005        2381.00        2372.57          48.80
       417         0.2008        2275.00        2367.39          47.70
       418         0.2011        2237.00        2362.93          47.30
       419         0.2015        2247.00        2359.10          47.40
       420         0.2018        2333.00        2355.82          48.30
       421         0.2021        2304.00        2353.03          48.00
       422         0.2024        2266.00        2350.69          47.60
       423         0.2028        2285.00        2348.75          47.80
       424         0.2031        2304.00        2347.17          48.00
       425         0.2034        2275.00        2345.91          47.70
       426         0.2038        2266.00        2344.94          47.60
       427         0.2041        2256.00        2344.23          47.50
       428         0.2044        2247.00        2335.53          47.40
       429         0.2047        2275.00        2314.07          47.70
       430         0.2051        2323.00        2302.99          48.20
       431         0.2054        2304.00        2289.99          48.00
       432         0.2057        2314.00        2292.59          48.10
       433         0.2060        2275.00        2295.20          47.70
       434         0.2064        2294.00        2297.83          47.90
       435         0.2067        2285.00        2300.47          47.80
       436         0.2070        2314.00        2303.11          48.10
       437         0.2073        2304.00        2305.77          48.00
       438         0.2077        2352.00        2308.44          48.50
       439         0.2080        2314.00        2311.13          48.10
       440         0.2083        2314.00        2313.82          48.10
       441         0.2087        2314.00        2316.52          48.10
       442         0.2090        2333.00        2319.23          48.30
       443         0.2093        2162.00        2321.95          46.50
       444         0.2096        2285.00        2324.68          47.80
       445         0.2100        2228.00        2327.42          47.20
       446         0.2103        2247.00        2330.17          47.40
       447         0.2106        2200.00        2332.93          46.90
       448         0.2109        2266.00        2335.70          47.60
       449         0.2113        2421.00        2338.47          49.20
       450         0.2116        2314.00        2341.26          48.10
       451         0.2119        2343.00        2344.05          48.40
       452         0.2122        2333.00        2346.85          48.30
       453         0.2126        2266.00        2357.08          47.60
       454         0.2129        2266.00        2360.29          47.60
       455         0.2132        2275.00        2367.21          47.70
       456         0.2136        2294.00        2370.70          47.90
       457         0.2139        2391.00        2374.26          48.90
       458         0.2142        2266.00        2402.74          47.60
       459         0.2145        2314.00        2407.86          48.10
       460         0.2149        2314.00        2425.44          48.10
       461         0.2152        2323.00        2431.70          48.20
       462         0.2155        2362.00        2438.29          48.60
       463         0.2158        2381.00        2445.24          48.80
       464         0.2162        2304.00        2452.61          48.00
       465         0.2165        2294.00        2460.45          47.90
       466         0.2168        2381.00        2468.82          48.80
       467         0.2171        2421.00        2477.81          49.20
       468         0.2175        2530.00        2487.51          50.30
       469         0.2178        2304.00        2498.02          48.00
       470         0.2181        2372.00        2509.49          48.70
       471         0.2184        2343.00        2522.08          48.40
       472         0.2188        2411.00        2535.99          49.10
       473         0.2191        2372.00        2551.47          48.70
       474         0.2194        2323.00        2568.85          48.20
       475         0.2198        2450.00        2588.51          49.50
       476         0.2201        2470.00        2610.97          49.70
       477         0.2204        2470.00        2636.85          49.70
       478         0.2207        2570.00        2666.97          50.70
       479         0.2211        2530.00        2702.35          50.30
       480         0.2214        2663.00        2744.33          51.60
       481         0.2217        2673.00        2794.89          51.70
       482         0.2220        2621.00        2857.44          51.20
       483         0.2224        2777.00        2938.64          52.70
       484         0.2227        2841.00        3051.62          53.30
       485         0.2230        3036.00        3220.71          55.10
       486         0.2233        3260.00        3488.40          57.10
       487         0.2237        3758.00        3925.46          61.30
       488         0.2240        4369.00        4642.21          66.10
       489         0.2243        5446.00        5784.68          73.80
       490         0.2246        7106.00        7490.80          84.30
       491         0.2250        9428.00        9799.81          97.10
       492         0.2253       12321.00       12601.70         111.00
       493         0.2256       15800.00       15686.50         125.70
       494         0.2259       19238.00       18561.00         138.70
       495         0.2263       22082.00       20256.50         148.60
       496         0.2266       22650.00       20027.80         150.50
       497         0.2269       20221.00       17948.30         142.20
       498         0.2272       16154.00       14670.40         127.10
       499         0.2276       11772.00       11123.20         108.50
       500         0.2279        8136.00        8099.69          90.20
       501         0.2282        5776.00        5936.83          76.00
       502         0.2285        4396.00        4580.29          66.30
       503         0.2289        3758.00        3814.04          61.30
       504         0.2292        3306.00        3403.72          57.50
       505         0.2295        3114.00        3181.12          55.80
       506         0.2298        3047.00        3050.82          55.20
       507         0.2302        2927.00        2966.26          54.10
       508         0.2305        2905.00        2906.37          53.90
       509         0.2308        2673.00        2861.43          51.70
       510         0.2311        2704.00        2854.13          52.00
       511         0.2315        2673.00        2827.84          51.70
       512         0.2318        2673.00        2820.79          51.70
       513         0.2321        2714.00        2823.58          52.10
       514         0.2324        2560.00        2812.89          50.60
       515         0.2328        2601.00        2814.47          51.00
       516         0.2331        2663.00        2810.51          51.60
       517         0.2334        2673.00        2809.28          51.70
       518         0.2337        2704.00        2810.61          52.00
       519         0.2341        2673.00        2814.42          51.70
       520         0.2344        2673.00        2820.74          51.70
       521         0.2347        2683.00        2829.68          51.80
       522         0.2350        2714.00        2841.43          52.10
       523         0.2354        2632.00        2856.29          51.30
       524         0.2357        2725.00        2874.67          52.20
       525         0.2360        2830.00        2897.11          53.20
       526         0.2363        2841.00        2924.37          53.30
       527         0.2367        2873.00        2957.81          53.60
       528         0.2370        2927.00        3000.39          54.10
       529         0.2373        2927.00        3058.67          54.10
       530         0.2376        3136.00        3145.94          56.00
       531         0.2380        3295.00        3278.10          57.40
       532         0.2383        3493.00        3480.52          59.10
       533         0.2386        3856.00        3839.19          62.10
       534         0.2389        4303.00        4382.21          65.60
       535         0.2393        5013.00        5181.40          70.80
       536         0.2396        5776.00        6226.82          76.00
       537         0.2399        6659.00        7363.79          81.60
       538         0.2402        7448.00        8243.47          86.30
       539         0.2405        7797.00        8550.73          88.30
       540         0.2409        7656.00        8232.54          87.50
       541         0.2412        6906.00        7434.06          83.10
       542         0.2415        6147.00        6422.44          78.40
       543         0.2418        5285.00        5503.49          72.70
       544         0.2422        4733.00        4777.56          68.80
       545         0.2425        4147.00        4323.69          64.40
       546         0.2428        3856.00        4078.23          62.10
       547         0.2431        3869.00        3995.33          62.20
       548         0.2435        3894.00        4026.91          62.40
       549         0.2438        4096.00        4157.23          64.00
       550         0.2441        4303.00        4377.55          65.60
       551         0.2444        4733.00        4726.71          68.80
       552         0.2448        5242.00        5252.69          72.40
       553         0.2451        6194.00        6025.14          78.70
       554         0.2454        7310.00        7142.41          85.50
       555         0.2457        9139.00        8705.85          95.60
       556         0.2461       11321.00       10788.70         106.40
       557         0.2464       14042.00       13324.40         118.50
       558         0.2467       16744.00       15957.50         129.40
       559         0.2470       18934.00       18048.90         137.60
       560         0.2473       20449.00       18984.90         143.00
       561         0.2477       19516.00       18573.10         139.70
       562         0.2480       17609.00       16999.20         132.70
       563         0.2483       15203.00       14720.70         123.30
       564         0.2486       12321.00       12232.50         111.00
       565         0.2490       10181.00        9957.73         100.90
       566         0.2493        8263.00        8096.47          90.90
       567         0.2496        6939.00        6704.53          83.30
       568         0.2499        5960.00        5734.38          77.20
       569         0.2503        5373.00        5097.89          73.30
       570         0.2506        4802.00        4706.33          69.30
       571         0.2509        4556.00        4490.24          67.50
       572         0.2512        4369.00        4403.40          66.10
       573         0.2515        4173.00        4415.02          64.60
       574         0.2519        4032.00        4493.55          63.50
       575         0.2522        4134.00        4591.51          64.30
       576         0.2525        4212.00        4658.37          64.90
       577         0.2528        4160.00        4674.83          64.50
       578         0.2532        4096.00        4643.18          64.00
       579         0.2535        4070.00        4622.45          63.80
       580         0.2538        4225.00        4649.40          65.00
       581         0.2541        4543.00        4793.75          67.40
       582         0.2545        4928.00        5107.02          70.20
       583         0.2548        5550.00        5648.29          74.50
       584         0.2551        6610.00        6481.70          81.30
       585         0.2554        7868.00        7666.53          88.70
       586         0.2557        9643.00        9229.25          98.20
       587         0.2561       11816.00       11107.10         108.70
       588         0.2564       14113.00       13046.80         118.80
       589         0.2567       15800.00       14574.20         125.70
       590         0.2570       16435.00       15278.50         128.20
       591         0.2574       16180.00       15097.60         127.20
       592         0.2577       14689.00       14236.70         121.20
       593         0.2580       13225.00       13056.20         115.00
       594         0.2583       11794.00       11943.30         108.60
       595         0.2586       11109.00       11138.60         105.40
       596         0.2590       10858.00       10720.00         104.20
       597         0.2593       11172.00       10695.40         105.70
       598         0.2596       11946.00       11057.10         109.30
       599         0.2599       12814.00       11783.80         113.20
       600         0.2603       13666.00       12774.60         116.90
       601         0.2606       13971.00       13722.10         118.20
       602         0.2609       13924.00       14157.70         118.00
       603         0.2612       13202.00       13753.80         114.90
       604         0.2616       11881.00       12539.20         109.00
       605         0.2619       10201.00       10778.20         101.00
       606         0.2622        8281.00        8851.74          91.00
       607         0.2625        6806.00        7101.00          82.50
       608         0.2628        5746.00        5727.44          75.80
       609         0.2632        4858.00        4784.61          69.70
       610         0.2635        4199.00        4174.90          64.80
       611         0.2638        3931.00        3813.48          62.70
       612         0.2641        3624.00        3595.84          60.20
       613         0.2644        3422.00        3461.24          58.50
       614         0.2648        3387.00        3375.58          58.20
       615         0.2651        3260.00        3321.95          57.10
       616         0.2654        3249.00        3292.11          57.00
       617         0.2657        3260.00        3277.85          57.10
       618         0.2661        3215.00        3272.13          56.70
       619         0.2664        3158.00        3258.71          56.20
       620         0.2667        3158.00        3231.82          56.20
       621         0.2670        3058.00        3191.17          55.30
       622         0.2673        3047.00        3141.55          55.20
       623         0.2677        3003.00        3090.75          54.80
       624         0.2680        3014.00        3045.70          54.90
       625         0.2683        3003.00        3009.65          54.80
       626         0.2686        2820.00        2982.63          53.10
       627         0.2690        2916.00        2962.98          54.00
       628         0.2693        2938.00        2948.57          54.20
       629         0.2696        2894.00        2937.69          53.80
       630         0.2699        2820.00        2929.17          53.10
       631         0.2702        2884.00        2927.08          53.70
       632         0.2706        2927.00        2920.00          54.10
       633         0.2709        2884.00        2918.68          53.70
       634         0.2712        2948.00        2915.79          54.30
       635         0.2715        2916.00        2886.83          54.00
       636         0.2718        2852.00        2890.93          53.40
       637         0.2722        2862.00        2898.81          53.50
       638         0.2725        2905.00        2897.94          53.90
       639         0.2728        2938.00        2919.03          54.20
       640         0.2731        3080.00        2949.77          55.50
       641         0.2735        3091.00        2992.34          55.60
       642         0.2738        3272.00        3034.75          57.20
       643         0.2741        3295.00        3083.07          57.40
       644         0.2744        3364.00        3132.28          58.00
       645         0.2747        3411.00        3155.45          58.40
       646         0.2751        3364.00        3159.02          58.00
       647         0.2754        3306.00        3133.05          57.50
       648         0.2757        3364.00        3088.27          58.00
       649         0.2760        3260.00        3034.08          57.10
       650         0.2763        3192.00        2981.12          56.50
       651         0.2767        3025.00        2936.13          55.00
       652         0.2770        3025.00        2901.72          55.00
       653         0.2773        3036.00        2877.74          55.10
       654         0.2776        2938.00        2862.58          54.20
       655         0.2779        2959.00        2854.31          54.40
       656         0.2783        2948.00        2851.23          54.30
       657         0.2786        2830.00        2852.22          53.20
       658         0.2789        2884.00        2856.32          53.70
       659         0.2792        2938.00        2864.00          54.20
       660         0.2796        2916.00        2874.76          54.00
       661         0.2799        2948.00        2888.06          54.30
       662         0.2802        2948.00        2903.58          54.30
       663         0.2805        3003.00        2921.45          54.80
       664         0.2808        2959.00        2944.60          54.40
       665         0.2812        3025.00        2979.19          55.00
       666         0.2815        3036.00        3038.63          55.10
       667         0.2818        3102.00        3129.22          55.70
       668         0.2821        3306.00        3273.00          57.50
       669         0.2824        3411.00        3484.53          58.40
       670         0.2828        3588.00        3777.08          59.90
       671         0.2831        3919.00        4134.63          62.60
       672         0.2834        4212.00        4483.95          64.90
       673         0.2837        4369.00        4710.52          66.10
       674         0.2840        4422.00        4748.19          66.50
       675         0.2844        4290.00        4606.96          65.50
       676         0.2847        4032.00        4330.81          63.50
       677         0.2850        3844.00        3991.54          62.00
       678         0.2853        3672.00        3664.60          60.60
       679         0.2856        3446.00        3396.10          58.70
       680         0.2860        3226.00        3199.69          56.80
       681         0.2863        3204.00        3072.94          56.60
       682         0.2866        3069.00        2990.42          55.40
       683         0.2869        2948.00        2940.06          54.30
       684         0.2872        2927.00        2911.46          54.10
       685         0.2876        2862.00        2891.76          53.50
       686         0.2879        2916.00        2878.55          54.00
       687         0.2882        2959.00        2869.32          54.40
       688         0.2885        2884.00        2862.72          53.70
       689         0.2888        2970.00        2858.03          54.50
       690         0.2892        2905.00        2854.83          53.90
       691         0.2895        2830.00        2852.87          53.20
       692         0.2898        2820.00        2852.02          53.10
       693         0.2901        2862.00        2858.14          53.50
       694         0.2904        2830.00        2859.78          53.20
       695         0.2908        2884.00        2862.53          53.70
       696         0.2911        2894.00        2869.45          53.80
       697         0.2914        2852.00        2874.89          53.40
       698         0.2917        2905.00        2881.86          53.90
       699         0.2920        2894.00        2890.80          53.80
       700         0.2924        2916.00        2902.53          54.00
       701         0.2927        2992.00        2918.65          54.70
       702         0.2930        2948.00        2941.94          54.30
       703         0.2933        3036.00        2976.77          55.10
       704         0.2936        3102.00        3029.35          55.70
       705         0.2940        3102.00        3107.97          55.70
       706         0.2943        3192.00        3222.81          56.50
       707         0.2946        3399.00        3387.20          58.30
       708         0.2949        3660.00        3599.92          60.50
       709         0.2952        3919.00        3847.95          62.60
       710         0.2956        4225.00        4080.19          65.00
       711         0.2959        4422.00        4227.42          66.50
       712         0.2962        4516.00        4256.05          67.20
       713         0.2965        4583.00        4176.91          67.70
       714         0.2968        4449.00        4013.30          66.70
       715         0.2971        4238.00        3806.25          65.10
       716         0.2975        4134.00        3610.69          64.30
       717         0.2978        3869.00        3455.56          62.20
       718         0.2981        3709.00        3354.70          60.90
       719         0.2984        3721.00        3318.20          61.00
       720         0.2987        3564.00        3345.47          59.70
       721         0.2991        3624.00        3439.50          60.20
       722         0.2994        3819.00        3606.30          61.80
       723         0.2997        3919.00        3850.96          62.60
       724         0.3000        4199.00        4164.03          64.80
       725         0.3003        4556.00        4500.80          67.50
       726         0.3007        4858.00        4785.39          69.70
       727         0.3010        5013.00        4971.65          70.80
       728         0.3013        5055.00        5081.39          71.10
       729         0.3016        5098.00        5173.52          71.40
       730         0.3019        5300.00        5323.75          72.80
       731         0.3022        5670.00        5601.44          75.30
       732         0.3026        6022.00        5989.23          77.60
       733         0.3029        6545.00        6334.13          80.90
       734         0.3032        6691.00        6438.88          81.80
       735         0.3035        6512.00        6255.63          80.70
       736         0.3038        6068.00        5833.29          77.90
       737         0.3042        5329.00        5249.92          73.00
       738         0.3045        4747.00        4631.92          68.90
       739         0.3048        4134.00        4089.71          64.30
       740         0.3051        3648.00        3675.44          60.40
       741         0.3054        3341.00        3391.86          57.80
       742         0.3058        3125.00        3214.24          55.90
       743         0.3061        3102.00        3111.64          55.70
       744         0.3064        3058.00        3053.58          55.30
       745         0.3067        3003.00        3023.46          54.80
       746         0.3070        2981.00        3012.12          54.60
       747         0.3073        2970.00        3015.65          54.50
       748         0.3077        2894.00        3034.63          53.80
       749         0.3080        2970.00        3071.96          54.50
       750         0.3083        2959.00        3132.25          54.40
       751         0.3086        3003.00        3220.37          54.80
       752         0.3089        3025.00        3338.11          55.00
       753         0.3093        3204.00        3478.92          56.60
       754         0.3096        3226.00        3635.72          56.80
       755         0.3099        3238.00        3770.56          56.90
       756         0.3102        3283.00        3877.22          57.30
       757         0.3105        3318.00        3951.96          57.60
       758         0.3108        3434.00        3956.54          58.60
       759         0.3112        3306.00        3892.40          57.50
       760         0.3115        3306.00        3773.75          57.50
       761         0.3118        3295.00        3621.51          57.40
       762         0.3121        3091.00        3456.83          55.60
       763         0.3124        2970.00        3301.71          54.50
       764         0.3128        2981.00        3171.53          54.60
       765         0.3131        2905.00        3071.76          53.90
       766         0.3134        2862.00        3000.81          53.50
       767         0.3137        2852.00        2953.60          53.40
       768         0.3140        2841.00        2924.18          53.30
       769         0.3143        2746.00        2907.40          52.40
       770         0.3147        2852.00        2899.63          53.40
       771         0.3150        2841.00        2894.03          53.30
       772         0.3153        2873.00        2899.73          53.60
       773         0.3156        2927.00        2912.40          54.10
       774         0.3159        2992.00        2924.71          54.70
       775         0.3162        2948.00        2958.84          54.30
       776         0.3166        2959.00        3006.30          54.40
       777         0.3169        2916.00        3080.80          54.00
       778         0.3172        2927.00        3186.30          54.10
       779         0.3175        3136.00        3330.08          56.00
       780         0.3178        3192.00        3515.25          56.50
       781         0.3181        3260.00        3733.86          57.10
       782         0.3185        3387.00        3959.22          58.20
       783         0.3188        3469.00        4145.11          58.90
       784         0.3191        3612.00        4245.80          60.10
       785         0.3194        3636.00        4244.87          60.30
       786         0.3197        3564.00        4155.92          59.70
       787         0.3201        3493.00        4005.31          59.10
       788         0.3204        3352.00        3827.01          57.90
       789         0.3207        3364.00        3654.94          58.00
       790         0.3210        3249.00        3509.67          57.00
       791         0.3213        3158.00        3396.34          56.20
       792         0.3216        3114.00        3312.04          55.80
       793         0.3220        3260.00        3252.22          57.10
       794         0.3223        3125.00        3213.01          55.90
       795         0.3226        3114.00        3193.45          55.80
       796         0.3229        3091.00        3196.72          55.60
       797         0.3232        3226.00        3229.55          56.80
       798         0.3235        3399.00        3301.49          58.30
       799         0.3239        3411.00        3424.89          58.40
       800         0.3242        3612.00        3615.10          60.10
       801         0.3245        4032.00        3888.92          63.50
       802         0.3248        4382.00        4257.79          66.20
       803         0.3251        4956.00        4712.19          70.40
       804         0.3254        5520.00        5200.08          74.30
       805         0.3258        6241.00        5612.27          79.00
       806         0.3261        6642.00        5840.15          81.50
       807         0.3264        6708.00        5846.29          81.90
       808         0.3267        6336.00        5653.72          79.60
       809         0.3270        5883.00        5305.13          76.70
       810         0.3273        5402.00        4866.50          73.50
       811         0.3277        4858.00        4414.68          69.70
       812         0.3280        4396.00        4005.22          66.30
       813         0.3283        4020.00        3665.76          63.40
       814         0.3286        3636.00        3401.94          60.30
       815         0.3289        3422.00        3206.41          58.50
       816         0.3292        3226.00        3066.04          56.80
       817         0.3296        3125.00        2966.90          55.90
       818         0.3299        3069.00        2896.96          55.40
       819         0.3302        2905.00        2846.92          53.90
       820         0.3305        2852.00        2809.92          53.40
       821         0.3308        2809.00        2780.93          53.00
       822         0.3311        2798.00        2756.65          52.90
       823         0.3315        2714.00        2735.31          52.10
       824         0.3318        2704.00        2716.20          52.00
       825         0.3321        2777.00        2698.04          52.70
       826         0.3324        2714.00        2681.94          52.10
       827         0.3327        2611.00        2667.55          51.10
       828         0.3330        2601.00        2654.47          51.00
       829         0.3333        2704.00        2643.13          52.00
       830         0.3337        2632.00        2633.05          51.30
       831         0.3340        2560.00        2624.05          50.60
       832         0.3343        2621.00        2615.90          51.20
       833         0.3346        2642.00        2608.42          51.40
       834         0.3349        2550.00        2597.60          50.50
       835         0.3352        2601.00        2591.27          51.00
       836         0.3356        2591.00        2590.14          50.90
       837         0.3359        2570.00        2582.79          50.70
       838         0.3362        2500.00        2581.30          50.00
       839         0.3365        2540.00        2576.72          50.40
       840         0.3368        2560.00        2572.31          50.60
       841         0.3371        2550.00        2569.87          50.50
       842         0.3375        2560.00        2566.16          50.60
       843         0.3378        2520.00        2562.43          50.20
       844         0.3381        2440.00        2558.88          49.40
       845         0.3384        2520.00        2555.07          50.20
       846         0.3387        2430.00        2551.89          49.29
       847         0.3390        2510.00        2548.60          50.10
       848         0.3393        2470.00        2545.78          49.70
       849         0.3397        2470.00        2543.14          49.70
       850         0.3400        2470.00        2540.68          49.70
       851         0.3403        2440.00        2538.41          49.40
       852         0.3406        2470.00        2536.36          49.70
       853         0.3409        2530.00        2534.54          50.30
       854         0.3412        2381.00        2532.98          48.80
       855         0.3416        2470.00        2531.71          49.70
       856         0.3419        2470.00        2530.78          49.70
       857         0.3422        2460.00        2520.23          49.60
       858         0.3425        2510.00        2520.65          50.10
       859         0.3428        2560.00        2521.81          50.60
       860         0.3431        2470.00        2519.08          49.70
       861         0.3434        2530.00        2523.01          50.30
       862         0.3438        2470.00        2529.02          49.70
       863         0.3441        2391.00        2543.94          48.90
       864         0.3444        2581.00        2556.45          50.80
       865         0.3447        2540.00        2572.62          50.40
       866         0.3450        2540.00        2591.29          50.40
       867         0.3453        2550.00        2612.60          50.50
       868         0.3456        2621.00        2627.47          51.20
       869         0.3460        2652.00        2639.44          51.50
       870         0.3463        2621.00        2651.21          51.20
       871         0.3466        2611.00        2666.44          51.10
       872         0.3469        2663.00        2690.59          51.60
       873         0.3472        2788.00        2730.64          52.80
       874         0.3475        2798.00        2794.04          52.90
       875         0.3479        2905.00        2887.59          53.90
       876         0.3482        2992.00        3027.20          54.70
       877         0.3485        3147.00        3198.57          56.10
       878         0.3488        3283.00        3414.73          57.30
       879         0.3491        3422.00        3666.26          58.50
       880         0.3494        3624.00        3926.74          60.20
       881         0.3497        3770.00        4169.36          61.40
       882         0.3501        3982.00        4366.09          63.10
       883         0.3504        3869.00        4469.01          62.20
       884         0.3507        3721.00        4440.03          61.00
       885         0.3510        3709.00        4292.57          60.90
       886         0.3513        3481.00        4068.00          59.00
       887         0.3516        3318.00        3795.28          57.60
       888         0.3519        3192.00        3513.62          56.50
       889         0.3523        3080.00        3258.65          55.50
       890         0.3526        2894.00        3052.65          53.80
       891         0.3529        2809.00        2897.90          53.00
       892         0.3532        2714.00        2790.74          52.10
       893         0.3535        2725.00        2721.90          52.20
       894         0.3538        2683.00        2681.61          51.80
       895         0.3541        2663.00        2661.71          51.60
       896         0.3545        2632.00        2656.30          51.30
       897         0.3548        2725.00        2661.37          52.20
       898         0.3551        2704.00        2674.20          52.00
       899         0.3554        2683.00        2693.80          51.80
       900         0.3557        2767.00        2722.13          52.60
       901         0.3560        2820.00        2764.76          53.10
       902         0.3563        2852.00        2830.87          53.40
       903         0.3567        2948.00        2933.13          54.30
       904         0.3570        3147.00        3087.66          56.10
       905         0.3573        3295.00        3312.38          57.40
       906         0.3576        3564.00        3619.91          59.70
       907         0.3579        3856.00        4000.02          62.10
       908         0.3582        4238.00        4393.27          65.10
       909         0.3585        4343.00        4694.47          65.90
       910         0.3588        4476.00        4828.39          66.90
       911         0.3592        4529.00        4803.06          67.30
       912         0.3595        4290.00        4659.55          65.50
       913         0.3598        4199.00        4440.81          64.80
       914         0.3601        3956.00        4212.10          62.90
       915         0.3604        3931.00        4046.29          62.70
       916         0.3607        3844.00        3993.13          62.00
       917         0.3610        3782.00        4067.42          61.50
       918         0.3614        3931.00        4241.04          62.70
       919         0.3617        4032.00        4438.67          63.50
       920         0.3620        4122.00        4573.36          64.20
       921         0.3623        4070.00        4605.62          63.80
       922         0.3626        4173.00        4548.86          64.60
       923         0.3629        4070.00        4428.70          63.80
       924         0.3632        4045.00        4282.59          63.60
       925         0.3636        4007.00        4156.48          63.30
       926         0.3639        4032.00        4082.15          63.50
       927         0.3642        4096.00        4054.58          64.00
       928         0.3645        4070.00        4021.46          63.80
       929         0.3648        4134.00        3923.30          64.30
       930         0.3651        3982.00        3769.10          63.10
       931         0.3654        3745.00        3570.87          61.20
       932         0.3657        3564.00        3340.56          59.70
       933         0.3661        3283.00        3103.99          57.30
       934         0.3664        2981.00        2890.85          54.60
       935         0.3667        2746.00        2717.32          52.40
       936         0.3670        2570.00        2587.32          50.70
       937         0.3673        2550.00        2495.89          50.50
       938         0.3676        2430.00        2433.89          49.29
       939         0.3679        2391.00        2391.90          48.90
       940         0.3682        2430.00        2362.38          49.29
       941         0.3686        2294.00        2340.37          47.90
       942         0.3689        2256.00        2322.93          47.50
       943         0.3692        2275.00        2308.42          47.70
       944         0.3695        2209.00        2295.96          47.00
       945         0.3698        2256.00        2285.01          47.50
       946         0.3701        2181.00        2275.27          46.70
       947         0.3704        2200.00        2268.48          46.90
       948         0.3708        2162.00        2260.68          46.50
       949         0.3711        2162.00        2254.44          46.50
       950         0.3714        2172.00        2248.19          46.60
       951         0.3717        2209.00        2242.68          47.00
       952         0.3720        2209.00        2237.80          47.00
       953         0.3723        2181.00        2233.51          46.70
       954         0.3726        2181.00        2230.33          46.70
       955         0.3729        2190.00        2220.28          46.80
       956         0.3733        2181.00        2216.34          46.70
       957         0.3736        2116.00        2212.69          46.00
       958         0.3739        2134.00        2205.38          46.20
       959         0.3742        2125.00        2201.10          46.10
       960         0.3745        2052.00        2196.95          45.30
       961         0.3748        2116.00        2192.99          46.00
       962         0.3751        2088.00        2188.58          45.69
       963         0.3754        2079.00        2185.52          45.60
       964         0.3758        2098.00        2183.04          45.80
       965         0.3761        2107.00        2181.23          45.90
       966         0.3764        2061.00        2179.79          45.40
       967         0.3767        2116.00        2179.72          46.00
       968         0.3770        2098.00        2180.91          45.80
       969         0.3773        2144.00        2183.45          46.30
       970         0.3776        2098.00        2180.81          45.80
       971         0.3779        2209.00        2196.26          47.00
       972         0.3782        2200.00        2209.33          46.90
       973         0.3786        2172.00        2224.27          46.60
       974         0.3789        2190.00        2250.40          46.80
       975         0.3792        2421.00        2285.29          49.20
       976         0.3795        2480.00        2327.79          49.80
       977         0.3798        2570.00        2375.14          50.70
       978         0.3801        2611.00        2421.91          51.10
       979         0.3804        2683.00        2454.72          51.80
       980         0.3807        2683.00        2469.62          51.80
       981         0.3811        2683.00        2466.59          51.80
       982         0.3814        2642.00        2449.91          51.40
       983         0.3817        2652.00        2420.44          51.50
       984         0.3820        2632.00        2385.03          51.30
       985         0.3823        2581.00        2350.28          50.80
       986         0.3826        2550.00        2322.43          50.50
       987         0.3829        2480.00        2305.28          49.80
       988         0.3832        2540.00        2302.15          50.40
       989         0.3835        2490.00        2314.98          49.90
       990         0.3839        2530.00        2344.81          50.30
       991         0.3842        2663.00        2392.47          51.60
       992         0.3845        2809.00        2458.62          53.00
       993         0.3848        2862.00        2539.96          53.50
       994         0.3851        3003.00        2624.14          54.80
       995         0.3854        3058.00        2692.54          55.30
       996         0.3857        3080.00        2734.07          55.50
       997         0.3860        3091.00        2751.67          55.60
       998         0.3864        3114.00        2751.01          55.80
       999         0.3867        2992.00        2731.51          54.70
      1000         0.3870        2873.00        2690.41          53.60
      1001         0.3873        2746.00        2630.37          52.40
      1002         0.3876        2663.00        2560.73          51.60
      1003         0.3879        2560.00        2490.11          50.60
      1004         0.3882        2540.00        2422.74          50.40
      1005         0.3885        2450.00        2362.58          49.50
      1006         0.3888        2411.00        2314.65          49.10
      1007         0.3892        2440.00        2282.74          49.40
      1008         0.3895        2352.00        2268.77          48.50
      1009         0.3898        2372.00        2273.71          48.70
      1010         0.3901        2391.00        2298.37          48.90
      1011         0.3904        2450.00        2343.52          49.50
      1012         0.3907        2560.00        2409.25          50.60
      1013         0.3910        2570.00        2492.83          50.70
      1014         0.3913        2725.00        2585.99          52.20
      1015         0.3916        2767.00        2673.85          52.60
      1016         0.3920        2798.00        2740.55          52.90
      1017         0.3923        2841.00        2778.55          53.30
      1018         0.3926        2981.00        2789.85          54.60
      1019         0.3929        2948.00        2778.80          54.30
      1020         0.3932        2959.00        2749.23          54.40
      1021         0.3935        2820.00        2706.95          53.10
      1022         0.3938        2852.00        2660.05          53.40
      1023         0.3941        2725.00        2615.32          52.20
      1024         0.3944        2621.00        2582.51          51.20
      1025         0.3947        2540.00        2543.91          50.40
      1026         0.3951        2570.00        2506.88          50.70
      1027         0.3954        2391.00        2475.51          48.90
      1028         0.3957        2421.00        2455.09          49.20
      1029         0.3960        2490.00        2449.42          49.90
      1030         0.3963        2460.00        2462.74          49.60
      1031         0.3966        2591.00        2496.86          50.90
      1032         0.3969        2798.00        2546.88          52.90
      1033         0.3972        2809.00        2599.41          53.00
      1034         0.3975        2938.00        2638.65          54.20
      1035         0.3979        3014.00        2656.03          54.90
      1036         0.3982        2992.00        2650.16          54.70
      1037         0.3985        2862.00        2618.69          53.50
      1038         0.3988        2852.00        2563.95          53.40
      1039         0.3991        2725.00        2490.72          52.20
      1040         0.3994        2601.00        2412.67          51.00
      1041         0.3997        2440.00        2330.89          49.40
      1042         0.4000        2372.00        2254.03          48.70
      1043         0.4003        2294.00        2185.89          47.90
      1044         0.4006        2190.00        2128.96          46.80
      1045         0.4010        2153.00        2080.30          46.40
      1046         0.4013        2116.00        2042.54          46.00
      1047         0.4016        1998.00        2014.12          44.70
      1048         0.4019        1989.00        1991.55          44.60
      1049         0.4022        1962.00        1975.06          44.29
      1050         0.4025        1954.00        1962.20          44.20
      1051         0.4028        1998.00        1952.75          44.70
      1052         0.4031        1971.00        1949.92          44.40
      1053         0.4034        1971.00        1944.72          44.40
      1054         0.4037        1892.00        1941.19          43.50
      1055         0.4041        1927.00        1939.01          43.90
      1056         0.4044        1980.00        1942.57          44.50
      1057         0.4047        1918.00        1943.07          43.79
      1058         0.4050        1892.00        1944.90          43.50
      1059         0.4053        1849.00        1948.11          43.00
      1060         0.4056        1875.00        1952.90          43.30
      1061         0.4059        1875.00        1959.62          43.30
      1062         0.4062        1945.00        1968.85          44.10
      1063         0.4065        1945.00        1981.59          44.10
      1064         0.4068        1945.00        1999.35          44.10
      1065         0.4071        2043.00        2024.35          45.20
      1066         0.4075        2034.00        2059.67          45.10
      1067         0.4078        2098.00        2109.31          45.80
      1068         0.4081        2070.00        2177.93          45.50
      1069         0.4084        2181.00        2269.85          46.70
      1070         0.4087        2266.00        2387.31          47.60
      1071         0.4090        2440.00        2529.69          49.40
      1072         0.4093        2490.00        2695.53          49.90
      1073         0.4096        2767.00        2881.67          52.60
      1074         0.4099        2959.00        3071.32          54.40
      1075         0.4102        3147.00        3236.87          56.10
      1076         0.4105        3318.00        3342.84          57.60
      1077         0.4109        3411.00        3369.60          58.40
      1078         0.4112        3352.00        3327.41          57.90
      1079         0.4115        3147.00        3235.27          56.10
      1080         0.4118        3025.00        3108.65          55.00
      1081         0.4121        2884.00        2966.99          53.70
      1082         0.4124        2735.00        2836.71          52.30
      1083         0.4127        2591.00        2746.88          50.90
      1084         0.4130        2510.00        2705.06          50.10
      1085         0.4133        2401.00        2723.30          49.00
      1086         0.4136        2440.00        2797.13          49.40
      1087         0.4139        2411.00        2906.53          49.10
      1088         0.4143        2372.00        3015.13          48.70
      1089         0.4146        2450.00        3090.20          49.50
      1090         0.4149        2490.00        3125.39          49.90
      1091         0.4152        2510.00        3125.80          50.10
      1092         0.4155        2550.00        3100.28          50.50
      1093         0.4158        2591.00        3062.10          50.90
      1094         0.4161        2725.00        3046.74          52.20
      1095         0.4164        2830.00        3063.84          53.20
      1096         0.4167        2959.00        3141.65          54.40
      1097         0.4170        3102.00        3279.77          55.70
      1098         0.4173        3170.00        3446.02          56.30
      1099         0.4177        3306.00        3567.58          57.50
      1100         0.4180        3295.00        3603.86          57.40
      1101         0.4183        3249.00        3567.46          57.00
      1102         0.4186        3047.00        3467.82          55.20
      1103         0.4189        3114.00        3320.08          55.80
      1104         0.4192        2873.00        3134.16          53.60
      1105         0.4195        2767.00        2935.55          52.60
      1106         0.4198        2540.00        2740.94          50.40
      1107         0.4201        2421.00        2568.41          49.20
      1108         0.4204        2237.00        2423.11          47.30
      1109         0.4207        2153.00        2303.56          46.40
      1110         0.4210        2153.00        2206.25          46.40
      1111         0.4214        2144.00        2129.57          46.30
      1112         0.4217        2125.00        2067.60          46.10
      1113         0.4220        1989.00        2019.51          44.60
      1114         0.4223        1910.00        1983.21          43.70
      1115         0.4226        1875.00        1957.84          43.30
      1116         0.4229        1901.00        1940.58          43.60
      1117         0.4232        1875.00        1931.52          43.30
      1118         0.4235        1936.00        1930.69          44.00
      1119         0.4238        1954.00        1938.63          44.20
      1120         0.4241        1892.00        1957.79          43.50
      1121         0.4244        1910.00        1988.75          43.70
      1122         0.4247        2043.00        2035.72          45.20
      1123         0.4250        2034.00        2102.55          45.10
      1124         0.4254        2070.00        2190.35          45.50
      1125         0.4257        2200.00        2296.72          46.90
      1126         0.4260        2333.00        2408.34          48.30
      1127         0.4263        2401.00        2505.96          49.00
      1128         0.4266        2411.00        2578.03          49.10
      1129         0.4269        2440.00        2627.44          49.40
      1130         0.4272        2372.00        2662.83          48.70
      1131         0.4275        2421.00        2684.99          49.20
      1132         0.4278        2470.00        2705.65          49.70
      1133         0.4281        2421.00        2721.37          49.20
      1134         0.4284        2450.00        2731.73          49.50
      1135         0.4287        2381.00        2735.39          48.80
      1136         0.4290        2401.00        2738.50          49.00
      1137         0.4294        2343.00        2745.80          48.40
      1138         0.4297        2421.00        2751.93          49.20
      1139         0.4300        2343.00        2751.07          48.40
      1140         0.4303        2401.00        2731.58          49.00
      1141         0.4306        2510.00        2699.49          50.10
      1142         0.4309        2510.00        2663.02          50.10
      1143         0.4312        2581.00        2632.10          50.80
      1144         0.4315        2611.00        2613.23          51.10
      1145         0.4318        2621.00        2617.39          51.20
      1146         0.4321        2642.00        2654.75          51.40
      1147         0.4324        2767.00        2746.01          52.60
      1148         0.4327        2948.00        2906.31          54.30
      1149         0.4330        3318.00        3147.49          57.60
      1150         0.4334        3588.00        3478.25          59.90
      1151         0.4337        3982.00        3897.22          63.10
      1152         0.4340        4516.00        4377.46          67.20
      1153         0.4343        5084.00        4867.93          71.30
      1154         0.4346        5685.00        5305.98          75.40
      1155         0.4349        5914.00        5647.99          76.90
      1156         0.4352        6053.00        5857.73          77.80
      1157         0.4355        6006.00        5896.06          77.50
      1158         0.4358        5822.00        5747.17          76.30
      1159         0.4361        5580.00        5445.79          74.70
      1160         0.4364        5112.00        5046.01          71.50
      1161         0.4367        4679.00        4592.69          68.40
      1162         0.4370        4316.00        4123.94          65.70
      1163         0.4373        3782.00        3677.55          61.50
      1164         0.4376        3469.00        3282.28          58.90
      1165         0.4380        3260.00        2955.40          57.10
      1166         0.4383        2927.00        2698.43          54.10
      1167         0.4386        2767.00        2506.40          52.60
      1168         0.4389        2621.00        2370.61          51.20
      1169         0.4392        2510.00        2283.71          50.10
      1170         0.4395        2381.00        2237.96          48.80
      1171         0.4398        2343.00        2228.24          48.40
      1172         0.4401        2343.00        2251.12          48.40
      1173         0.4404        2372.00        2305.69          48.70
      1174         0.4407        2480.00        2381.25          49.80
      1175         0.4410        2372.00        2468.16          48.70
      1176         0.4413        2421.00        2547.90          49.20
      1177         0.4416        2470.00        2602.29          49.70
      1178         0.4419        2391.00        2617.00          48.90
      1179         0.4422        2352.00        2597.44          48.50
      1180         0.4426        2440.00        2548.02          49.40
      1181         0.4429        2372.00        2474.46          48.70
      1182         0.4432        2294.00        2384.38          47.90
      1183         0.4435        2285.00        2289.77          47.80
      1184         0.4438        2237.00        2201.02          47.30
      1185         0.4441        2162.00        2126.48          46.50
      1186         0.4444        2144.00        2071.77          46.30
      1187         0.4447        2172.00        2039.41          46.60
      1188         0.4450        2209.00        2030.77          47.00
      1189         0.4453        2181.00        2046.55          46.70
      1190         0.4456        2323.00        2082.78          48.20
      1191         0.4459        2314.00        2138.78          48.10
      1192         0.4462        2285.00        2209.98          47.80
      1193         0.4465        2411.00        2286.48          49.10
      1194         0.4468        2333.00        2348.36          48.30
      1195         0.4471        2247.00        2381.73          47.40
      1196         0.4475        2266.00        2387.39          47.60
      1197         0.4478        2275.00        2371.50          47.70
      1198         0.4481        2256.00        2349.27          47.50
      1199         0.4484        2218.00        2312.78          47.10
      1200         0.4487        2218.00        2278.40          47.10
      1201         0.4490        2266.00        2249.13          47.60
      1202         0.4493        2200.00        2224.28          46.90
      1203         0.4496        2228.00        2195.87          47.20
      1204         0.4499        2162.00        2158.60          46.50
      1205         0.4502        2144.00        2114.48          46.30
      1206         0.4505        2098.00        2066.84          45.80
      1207         0.4508        2125.00        2016.84          46.10
      1208         0.4511        2116.00        1966.02          46.00
      1209         0.4514        2079.00        1919.05          45.60
      1210         0.4517        2034.00        1881.34          45.10
      1211         0.4520        2016.00        1856.90          44.90
      1212         0.4523        1971.00        1841.10          44.40
      1213         0.4526        2043.00        1840.08          45.20
      1214         0.4530        2134.00        1864.71          46.20
      1215         0.4533        2200.00        1903.95          46.90
      1216         0.4536        2218.00        1949.86          47.10
      1217         0.4539        2314.00        1997.02          48.10
      1218         0.4542        2470.00        2041.09          49.70
      1219         0.4545        2591.00        2070.21          50.90
      1220         0.4548        2601.00        2082.72          51.00
      1221         0.4551        2601.00        2081.21          51.00
      1222         0.4554        2560.00        2069.39          50.60
      1223         0.4557        2520.00        2051.51          50.20
      1224         0.4560        2470.00        2033.55          49.70
      1225         0.4563        2275.00        2022.99          47.70
      1226         0.4566        2362.00        2027.21          48.60
      1227         0.4569        2237.00        2051.93          47.30
      1228         0.4572        2190.00        2100.98          46.80
      1229         0.4575        2190.00        2169.18          46.80
      1230         0.4578        2275.00        2247.28          47.70
      1231         0.4581        2323.00        2318.90          48.20
      1232         0.4584        2218.00        2371.56          47.10
      1233         0.4588        2275.00        2403.16          47.70
      1234         0.4591        2362.00        2422.44          48.60
      1235         0.4594        2440.00        2436.92          49.40
      1236         0.4597        2421.00        2453.98          49.20
      1237         0.4600        2510.00        2478.51          50.10
      1238         0.4603        2632.00        2510.62          51.30
      1239         0.4606        2581.00        2547.05          50.80
      1240         0.4609        2714.00        2561.36          52.10
      1241         0.4612        2746.00        2546.49          52.40
      1242         0.4615        2704.00        2498.88          52.00
      1243         0.4618        2632.00        2435.50          51.30
      1244         0.4621        2540.00        2357.28          50.40
      1245         0.4624        2581.00        2273.09          50.80
      1246         0.4627        2391.00        2190.13          48.90
      1247         0.4630        2314.00        2122.42          48.10
      1248         0.4633        2228.00        2078.91          47.20
      1249         0.4636        2134.00        2065.21          46.20
      1250         0.4639        2153.00        2080.95          46.40
      1251         0.4642        2116.00        2127.78          46.00
      1252         0.4645        2190.00        2195.74          46.80
      1253         0.4648        2256.00        2271.05          47.50
      1254         0.4651        2228.00        2336.02          47.20
      1255         0.4655        2247.00        2380.55          47.40
      1256         0.4658        2228.00        2399.33          47.20
      1257         0.4661        2256.00        2399.68          47.50
      1258         0.4664        2256.00        2384.97          47.50
      1259         0.4667        2314.00        2366.76          48.10
      1260         0.4670        2285.00        2337.97          47.80
      1261         0.4673        2294.00        2312.96          47.90
      1262         0.4676        2304.00        2293.91          48.00
      1263         0.4679        2352.00        2279.13          48.50
      1264         0.4682        2381.00        2262.08          48.80
      1265         0.4685        2362.00        2237.57          48.60
      1266         0.4688        2450.00        2204.75          49.50
      1267         0.4691        2333.00        2164.58          48.30
      1268         0.4694        2323.00        2119.49          48.20
      1269         0.4697        2275.00        2070.15          47.70
      1270         0.4700        2256.00        2021.00          47.50
      1271         0.4703        2162.00        1977.22          46.50
      1272         0.4706        2034.00        1943.02          45.10
      1273         0.4709        2098.00        1922.90          45.80
      1274         0.4712        2061.00        1919.87          45.40
      1275         0.4715        2098.00        1935.22          45.80
      1276         0.4718        2007.00        1967.44          44.80
      1277         0.4721        2034.00        2012.24          45.10
      1278         0.4724        2052.00        2067.35          45.30
      1279         0.4727        2125.00        2139.32          46.10
      1280         0.4730        2209.00        2242.78          47.00
      1281         0.4734        2285.00        2393.90          47.80
      1282         0.4737        2430.00        2606.29          49.29
      1283         0.4740        2735.00        2885.03          52.30
      1284         0.4743        2992.00        3209.23          54.70
      1285         0.4746        3481.00        3519.07          59.00
      1286         0.4749        3770.00        3722.08          61.40
      1287         0.4752        3733.00        3772.01          61.10
      1288         0.4755        3770.00        3701.03          61.40
      1289         0.4758        3564.00        3552.07          59.70
      1290         0.4761        3249.00        3345.51          57.00
      1291         0.4764        3069.00        3097.33          55.40
      1292         0.4767        2820.00        2841.47          53.10
      1293         0.4770        2652.00        2609.66          51.50
      1294         0.4773        2470.00        2426.84          49.70
      1295         0.4776        2333.00        2300.57          48.30
      1296         0.4779        2237.00        2223.25          47.30
      1297         0.4782        2190.00        2178.06          46.80
      1298         0.4785        2200.00        2152.51          46.90
      1299         0.4788        2162.00        2142.01          46.50
      1300         0.4791        2209.00        2147.81          47.00
      1301         0.4794        2228.00        2172.87          47.20
      1302         0.4797        2352.00        2222.31          48.50
      1303         0.4800        2581.00        2305.26          50.80
      1304         0.4803        2673.00        2421.37          51.70
      1305         0.4806        2884.00        2561.78          53.70
      1306         0.4809        3125.00        2697.37          55.90
      1307         0.4812        3295.00        2794.06          57.40
      1308         0.4815        3376.00        2831.11          58.10
      1309         0.4818        3364.00        2810.31          58.00
      1310         0.4821        3283.00        2743.02          57.30
      1311         0.4824        3249.00        2640.49          57.00
      1312         0.4828        2959.00        2511.65          54.40
      1313         0.4831        2756.00        2379.81          52.50
      1314         0.4834        2570.00        2238.88          50.70
      1315         0.4837        2411.00        2113.15          49.10
      1316         0.4840        2181.00        2011.77          46.70
      1317         0.4843        2162.00        1938.44          46.50
      1318         0.4846        2070.00        1889.39          45.50
      1319         0.4849        1989.00        1864.03          44.60
      1320         0.4852        1945.00        1858.15          44.10
      1321         0.4855        1910.00        1863.80          43.70
      1322         0.4858        1884.00        1869.87          43.41
      1323         0.4861        1892.00        1873.58          43.50
      1324         0.4864        1832.00        1869.67          42.80
      1325         0.4867        1832.00        1861.69          42.80
      1326         0.4870        1849.00        1849.49          43.00
      1327         0.4873        1866.00        1833.32          43.20
      1328         0.4876        1866.00        1817.64          43.20
      1329         0.4879        1823.00        1807.55          42.70
      1330         0.4882        1901.00        1807.90          43.60
      1331         0.4885        1884.00        1822.58          43.41
      1332         0.4888        1875.00        1857.44          43.30
      1333         0.4891        2079.00        1916.11          45.60
      1334         0.4894        2070.00        2014.39          45.50
      1335         0.4897        2153.00        2150.47          46.40
      1336         0.4900        2323.00        2319.39          48.20
      1337         0.4903        2520.00        2499.22          50.20
      1338         0.4906        2642.00        2655.36          51.40
      1339         0.4909        2788.00        2749.95          52.80
      1340         0.4912        2830.00        2779.44          53.20
      1341         0.4915        2798.00        2761.71          52.90
      1342         0.4918        2820.00        2709.81          53.10
      1343         0.4921        2694.00        2623.95          51.90
      1344         0.4924        2601.00        2510.94          51.00
      1345         0.4927        2520.00        2395.98          50.20
      1346         0.4930        2381.00        2285.04          48.80
      1347         0.4933        2266.00        2196.68          47.60
      1348         0.4936        2314.00        2137.62          48.10
      1349         0.4939        2343.00        2114.61          48.40
      1350         0.4942        2323.00        2126.87          48.20
      1351         0.4945        2237.00        2174.52          47.30
      1352         0.4948        2411.00        2254.59          49.10
      1353         0.4951        2560.00        2359.08          50.60
      1354         0.4954        2642.00        2487.15          51.40
      1355         0.4957        2767.00        2650.62          52.60
      1356         0.4960        2938.00        2862.26          54.20
      1357         0.4963        3272.00        3128.19          57.20
      1358         0.4966        3588.00        3425.21          59.90
      1359         0.4969        3856.00        3696.93          62.10
      1360         0.4973        4122.00        3876.52          64.20
      1361         0.4976        4122.00        3944.10          64.20
      1362         0.4979        3982.00        3933.37          63.10
      1363         0.4982        4032.00        3873.80          63.50
      1364         0.4985        3844.00        3777.81          62.00
      1365         0.4988        3636.00        3613.10          60.30
      1366         0.4991        3329.00        3408.69          57.70
      1367         0.4994        3014.00        3193.37          54.90
      1368         0.4997        2830.00        2989.67          53.20
      1369         0.5000        2683.00        2811.24          51.80
      1370         0.5003        2601.00        2658.94          51.00
      1371         0.5006        2440.00        2536.72          49.40
      1372         0.5009        2450.00        2445.22          49.50
      1373         0.5012        2314.00        2383.49          48.10
      1374         0.5015        2237.00        2348.63          47.30
      1375         0.5018        2247.00        2335.01          47.40
      1376         0.5021        2237.00        2334.88          47.30
      1377         0.5024        2266.00        2340.32          47.60
      1378         0.5027        2275.00        2352.19          47.70
      1379         0.5030        2247.00        2374.01          47.40
      1380         0.5033        2294.00        2409.75          47.90
      1381         0.5036        2352.00        2462.94          48.50
      1382         0.5039        2460.00        2539.05          49.60
      1383         0.5042        2510.00        2654.73          50.10
      1384         0.5045        2601.00        2785.31          51.00
      1385         0.5048        2735.00        2930.02          52.30
      1386         0.5051        2873.00        3073.04          53.60
      1387         0.5054        3025.00        3199.94          55.00
      1388         0.5057        3058.00        3308.66          55.30
      1389         0.5060        3170.00        3409.41          56.30
      1390         0.5063        3204.00        3528.58          56.60
      1391         0.5066        3295.00        3680.82          57.40
      1392         0.5069        3422.00        3875.20          58.50
      1393         0.5072        3552.00        4098.34          59.60
      1394         0.5075        3660.00        4310.62          60.50
      1395         0.5078        3721.00        4450.81          61.00
      1396         0.5081        3697.00        4480.18          60.80
      1397         0.5084        3807.00        4405.42          61.70
      1398         0.5087        3588.00        4250.13          59.90
      1399         0.5090        3528.00        4035.76          59.40
      1400         0.5093        3387.00        3788.83          58.20
      1401         0.5096        3170.00        3505.29          56.30
      1402         0.5099        2938.00        3222.00          54.20
      1403         0.5102        2862.00        2966.95          53.50
      1404         0.5105        2683.00        2756.09          51.80
      1405         0.5108        2581.00        2604.86          50.80
      1406         0.5111        2440.00        2517.93          49.40
      1407         0.5114        2460.00        2492.80          49.60
      1408         0.5117        2530.00        2539.99          50.30
      1409         0.5120        2510.00        2654.55          50.10
      1410         0.5123        2683.00        2832.26          51.80
      1411         0.5126        2862.00        3051.03          53.50
      1412         0.5129        3014.00        3268.73          54.90
      1413         0.5132        3102.00        3422.00          55.70
      1414         0.5135        3181.00        3478.77          56.40
      1415         0.5138        3114.00        3458.52          55.80
      1416         0.5141        3238.00        3396.25          56.90
      1417         0.5144        3136.00        3306.90          56.00
      1418         0.5147        2916.00        3195.23          54.00
      1419         0.5150        2905.00        3074.83          53.90
      1420         0.5153        2992.00        2969.95          54.70
      1421         0.5156        2862.00        2902.56          53.50
      1422         0.5159        2905.00        2884.98          53.90
      1423         0.5162        2841.00        2921.82          53.30
      1424         0.5165        2981.00        3008.53          54.60
      1425         0.5168        3114.00        3132.18          55.80
      1426         0.5171        3249.00        3271.34          57.00
      1427         0.5174        3457.00        3403.83          58.80
      1428         0.5177        3481.00        3515.13          59.00
      1429         0.5180        3709.00        3603.04          60.90
      1430         0.5183        3745.00        3667.26          61.20
      1431         0.5186        3745.00        3712.71          61.20
      1432         0.5189        3856.00        3734.12          62.10
      1433         0.5192        3844.00        3736.16          62.00
      1434         0.5195        3869.00        3730.26          62.20
      1435         0.5198        3856.00        3729.48          62.10
      1436         0.5201        3906.00        3748.36          62.50
      1437         0.5204        3869.00        3763.42          62.20
      1438         0.5207        4020.00        3788.06          63.40
      1439         0.5210        4096.00        3833.98          64.00
      1440         0.5213        4199.00        3898.20          64.80
      1441         0.5216        4343.00        3970.08          65.90
      1442         0.5219        4489.00        4036.04          67.00
      1443         0.5222        4422.00        4089.72          66.50
      1444         0.5225        4489.00        4139.20          67.00
      1445         0.5228        4422.00        4188.75          66.50
      1446         0.5231        4462.00        4253.17          66.80
      1447         0.5234        4570.00        4310.15          67.60
      1448         0.5237        4396.00        4349.41          66.30
      1449         0.5240        4356.00        4356.41          66.00
      1450         0.5243        4316.00        4336.75          65.70
      1451         0.5246        4238.00        4285.12          65.10
      1452         0.5249        4070.00        4205.08          63.80
      1453         0.5252        4058.00        4096.79          63.70
      1454         0.5255        3994.00        3973.37          63.20
      1455         0.5258        3894.00        3848.65          62.40
      1456         0.5261        3684.00        3736.62          60.70
      1457         0.5264        3660.00        3642.64          60.50
      1458         0.5267        3576.00        3566.25          59.80
      1459         0.5270        3588.00        3504.28          59.90
      1460         0.5273        3528.00        3450.71          59.40
      1461         0.5276        3493.00        3405.25          59.10
      1462         0.5279        3446.00        3366.67          58.70
      1463         0.5282        3434.00        3347.13          58.60
      1464         0.5285        3329.00        3344.68          57.70
      1465         0.5288        3318.00        3360.89          57.60
      1466         0.5291        3272.00        3395.18          57.20
      1467         0.5293        3226.00        3450.95          56.80
      1468         0.5296        3295.00        3527.13          57.40
      1469         0.5299        3260.00        3594.26          57.10
      1470         0.5302        3318.00        3644.77          57.60
      1471         0.5305        3422.00        3668.52          58.50
      1472         0.5308        3422.00        3662.49          58.50
      1473         0.5311        3364.00        3627.96          58.00
      1474         0.5314        3387.00        3565.95          58.20
      1475         0.5317        3387.00        3481.01          58.20
      1476         0.5320        3249.00        3380.18          57.00
      1477         0.5323        3125.00        3272.49          55.90
      1478         0.5326        3181.00        3167.34          56.40
      1479         0.5329        3102.00        3073.28          55.70
      1480         0.5332        2970.00        2997.73          54.50
      1481         0.5335        2948.00        2945.85          54.30
      1482         0.5338        2884.00        2923.73          53.70
      1483         0.5341        2894.00        2934.72          53.80
      1484         0.5344        2938.00        2982.86          54.20
      1485         0.5347        2948.00        3072.47          54.30
      1486         0.5350        3136.00        3207.56          56.00
      1487         0.5353        3272.00        3392.41          57.20
      1488         0.5356        3364.00        3627.45          58.00
      1489         0.5359        3770.00        3907.28          61.40
      1490         0.5362        3956.00        4228.27          62.90
      1491         0.5365        4212.00        4540.17          64.90
      1492         0.5368        4556.00        4826.19          67.50
      1493         0.5371        4761.00        5061.71          69.00
      1494         0.5374        4886.00        5233.25          69.90
      1495         0.5377        4872.00        5335.13          69.80
      1496         0.5380        4830.00        5378.22          69.50
      1497         0.5383        4872.00        5380.50          69.80
      1498         0.5386        4802.00        5352.84          69.30
      1499         0.5389        4872.00        5291.71          69.80
      1500         0.5392        4775.00        5203.65          69.10
      1501         0.5395        4638.00        5087.59          68.10
      1502         0.5398        4570.00        4952.02          67.60
      1503         0.5401        4516.00        4798.41          67.20
      1504         0.5404        4382.00        4623.45          66.20
      1505         0.5407        4264.00        4433.76          65.30
      1506         0.5410        4147.00        4232.40          64.40
      1507         0.5413        3969.00        4029.51          63.00
      1508         0.5416        3807.00        3830.64          61.70
      1509         0.5419        3564.00        3650.13          59.70
      1510         0.5422        3516.00        3483.82          59.30
      1511         0.5425        3329.00        3344.15          57.70
      1512         0.5428        3260.00        3238.89          57.10
      1513         0.5431        3125.00        3168.56          55.90
      1514         0.5434        3114.00        3132.00          55.80
      1515         0.5436        3170.00        3125.92          56.30
      1516         0.5439        3226.00        3139.44          56.80
      1517         0.5442        3181.00        3164.06          56.40
      1518         0.5445        3147.00        3191.53          56.10
      1519         0.5448        3114.00        3219.58          55.80
      1520         0.5451        3181.00        3251.69          56.40
      1521         0.5454        3158.00        3290.95          56.20
      1522         0.5457        3181.00        3342.28          56.40
      1523         0.5460        3249.00        3405.41          57.00
      1524         0.5463        3283.00        3479.42          57.30
      1525         0.5466        3204.00        3556.87          56.60
      1526         0.5469        3434.00        3622.27          58.60
      1527         0.5472        3481.00        3662.51          59.00
      1528         0.5475        3446.00        3669.18          58.70
      1529         0.5478        3306.00        3644.25          57.50
      1530         0.5481        3469.00        3595.48          58.90
      1531         0.5484        3352.00        3526.83          57.90
      1532         0.5487        3226.00        3441.79          56.80
      1533         0.5490        3181.00        3344.09          56.40
      1534         0.5493        3091.00        3239.02          55.60
      1535         0.5496        3058.00        3138.49          55.30
      1536         0.5499        2970.00        3047.88          54.50
      1537         0.5502        2862.00        2970.93          53.50
      1538         0.5505        2777.00        2911.06          52.70
      1539         0.5508        2694.00        2870.07          51.90
      1540         0.5511        2884.00        2847.58          53.70
      1541         0.5514        2830.00        2839.68          53.20
      1542         0.5517        2841.00        2855.23          53.30
      1543         0.5520        2894.00        2894.33          53.80
      1544         0.5523        2927.00        2952.90          54.10
      1545         0.5526        2959.00        3034.97          54.40
      1546         0.5528        2992.00        3134.66          54.70
      1547         0.5531        3170.00        3257.39          56.30
      1548         0.5534        3329.00        3393.68          57.70
      1549         0.5537        3481.00        3537.33          59.00
      1550         0.5540        3624.00        3687.60          60.20
      1551         0.5543        3844.00        3845.63          62.00
      1552         0.5546        3969.00        4012.00          63.00
      1553         0.5549        4147.00        4178.37          64.40
      1554         0.5552        4396.00        4332.41          66.30
      1555         0.5555        4436.00        4457.89          66.60
      1556         0.5558        4489.00        4549.74          67.00
      1557         0.5561        4638.00        4613.61          68.10
      1558         0.5564        4761.00        4655.16          69.00
      1559         0.5567        4816.00        4671.76          69.40
      1560         0.5570        4984.00        4644.85          70.60
      1561         0.5573        4816.00        4563.37          69.40
      1562         0.5576        4761.00        4450.65          69.00
      1563         0.5579        4489.00        4312.30          67.00
      1564         0.5582        4356.00        4185.17          66.00
      1565         0.5585        4264.00        4075.45          65.30
      1566         0.5588        4160.00        3984.23          64.50
      1567         0.5591        4096.00        3924.79          64.00
      1568         0.5594        3919.00        3894.55          62.60
      1569         0.5597        3807.00        3901.39          61.70
      1570         0.5600        3770.00        3937.74          61.40
      1571         0.5603        3956.00        3994.06          62.90
      1572         0.5605        3956.00        4062.15          62.90
      1573         0.5608        3982.00        4125.38          63.10
      1574         0.5611        4007.00        4170.03          63.30
      1575         0.5614        4045.00        4182.90          63.60
      1576         0.5617        4020.00        4162.94          63.40
      1577         0.5620        3982.00        4115.56          63.10
      1578         0.5623        3944.00        4048.99          62.80
      1579         0.5626        3856.00        3968.01          62.10
      1580         0.5629        3807.00        3874.46          61.70
      1581         0.5632        3733.00        3768.30          61.10
      1582         0.5635        3600.00        3656.04          60.00
      1583         0.5638        3552.00        3540.22          59.60
      1584         0.5641        3469.00        3426.48          58.90
      1585         0.5644        3283.00        3324.41          57.30
      1586         0.5647        3125.00        3230.06          55.90
      1587         0.5650        3125.00        3150.12          55.90
      1588         0.5653        3102.00        3084.16          55.70
      1589         0.5656        3080.00        3033.41          55.50
      1590         0.5659        2970.00        2999.56          54.50
      1591         0.5662        2970.00        2985.35          54.50
      1592         0.5665        3047.00        2990.41          55.20
      1593         0.5668        2981.00        3012.30          54.60
      1594         0.5670        2981.00        3043.59          54.60
      1595         0.5673        3003.00        3069.68          54.80
      1596         0.5676        2981.00        3082.16          54.60
      1597         0.5679        2905.00        3080.02          53.90
      1598         0.5682        3025.00        3069.19          55.00
      1599         0.5685        3014.00        3055.18          54.90
      1600         0.5688        2905.00        3038.18          53.90
      1601         0.5691        2959.00        3015.63          54.40
      1602         0.5694        3080.00        2996.34          55.50
      1603         0.5697        3025.00        2981.47          55.00
      1604         0.5700        3102.00        2975.49          55.70
      1605         0.5703        3058.00        2981.83          55.30
      1606         0.5706        3102.00        3001.71          55.70
      1607         0.5709        3204.00        3043.27          56.60
      1608         0.5712        3238.00        3096.15          56.90
      1609         0.5715        3341.00        3163.72          57.80
      1610         0.5718        3376.00        3241.14          58.10
      1611         0.5721        3564.00        3323.21          59.70
      1612         0.5724        3588.00        3401.95          59.90
      1613         0.5727        3684.00        3476.59          60.70
      1614         0.5729        3782.00        3541.80          61.50
      1615         0.5732        3819.00        3597.52          61.80
      1616         0.5735        3844.00        3646.51          62.00
      1617         0.5738        3944.00        3692.86          62.80
      1618         0.5741        3906.00        3744.49          62.50
      1619         0.5744        3994.00        3804.98          63.20
      1620         0.5747        4045.00        3877.99          63.60
      1621         0.5750        4096.00        3957.55          64.00
      1622         0.5753        4096.00        4032.19          64.00
      1623         0.5756        4020.00        4086.66          63.40
      1624         0.5759        3956.00        4111.49          62.90
      1625         0.5762        4070.00        4101.60          63.80
      1626         0.5765        4083.00        4072.62          63.90
      1627         0.5768        4007.00        4023.91          63.30
      1628         0.5771        3994.00        3958.39          63.20
      1629         0.5774        3994.00        3877.83          63.20
      1630         0.5777        3956.00        3784.23          62.90
      1631         0.5779        3931.00        3691.15          62.70
      1632         0.5782        3869.00        3604.84          62.20
      1633         0.5785        3782.00        3533.19          61.50
      1634         0.5788        3819.00        3480.11          61.80
      1635         0.5791        3832.00        3447.17          61.90
      1636         0.5794        3832.00        3432.48          61.90
      1637         0.5797        3869.00        3431.20          62.20
      1638         0.5800        3931.00        3438.56          62.70
      1639         0.5803        3894.00        3443.49          62.40
      1640         0.5806        3832.00        3450.73          61.90
      1641         0.5809        3894.00        3456.07          62.40
      1642         0.5812        3819.00        3466.74          61.80
      1643         0.5815        3894.00        3484.10          62.40
      1644         0.5818        3931.00        3507.67          62.70
      1645         0.5821        3856.00        3533.60          62.10
      1646         0.5824        3956.00        3562.45          62.90
      1647         0.5827        4147.00        3590.41          64.40
      1648         0.5829        4109.00        3612.76          64.10
      1649         0.5832        4058.00        3628.87          63.70
      1650         0.5835        4070.00        3634.55          63.80
      1651         0.5838       -4070.00        4070.00           0.00
      1652         0.5841       -4212.00        4212.00           0.00
      1653         0.5844       -4058.00        4058.00           0.00
      1654         0.5847       -4020.00        4020.00           0.00
      1655         0.5850       -4045.00        4045.00           0.00
      1656         0.5853       -4020.00        4020.00           0.00
      1657         0.5856       -4277.00        4277.00           0.00
      1658         0.5859       -4109.00        4109.00           0.00
      1659         0.5862       -4096.00        4096.00           0.00
      1660         0.5865       -4122.00        4122.00           0.00
      1661         0.5868       -4173.00        4173.00           0.00
      1662         0.5871       -4277.00        4277.00           0.00
      1663         0.5873       -4303.00        4303.00           0.00
      1664         0.5876       -4343.00        4343.00           0.00
      1665         0.5879       -4396.00        4396.00           0.00
      1666         0.5882       -4516.00        4516.00           0.00
      1667         0.5885       -4529.00        4529.00           0.00
      1668         0.5888       -4516.00        4516.00           0.00
      1669         0.5891       -4597.00        4597.00           0.00
      1670         0.5894       -4775.00        4775.00           0.00
      1671         0.5897       -4858.00        4858.00           0.00
      1672         0.5900       -4844.00        4844.00           0.00
      1673         0.5903       -5013.00        5013.00           0.00
      1674         0.5906       -5027.00        5027.00           0.00
      1675         0.5909       -5027.00        5027.00           0.00
      1676         0.5912       -5170.00        5170.00           0.00
      1677         0.5915       -5155.00        5155.00           0.00
      1678         0.5917       -5271.00        5271.00           0.00
      1679         0.5920       -5344.00        5344.00           0.00
      1680         0.5923       -5373.00        5373.00           0.00
      1681         0.5926       -5535.00        5535.00           0.00
      1682         0.5929       -5610.00        5610.00           0.00
      1683         0.5932       -5806.00        5806.00           0.00
      1684         0.5935       -5852.00        5852.00           0.00
      1685         0.5938       -5991.00        5991.00           0.00
      1686         0.5941       -6131.00        6131.00           0.00
      1687         0.5944       -6257.00        6257.00           0.00
      1688         0.5947       -6084.00        6084.00           0.00
      1689         0.5950       -6100.00        6100.00           0.00
      1690         0.5953       -5929.00        5929.00           0.00
      1691         0.5956       -5898.00        5898.00           0.00
      1692         0.5958       -5898.00        5898.00           0.00
      1693         0.5961       -5929.00        5929.00           0.00
      1694         0.5964       -5852.00        5852.00           0.00
      1695         0.5967       -5837.00        5837.00           0.00
      1696         0.5970       -5852.00        5852.00           0.00
      1697         0.5973       -5791.00        5791.00           0.00
      1698         0.5976       -5837.00        5837.00           0.00
      1699         0.5979       -5944.00        5944.00           0.00
      1700         0.5982       -5991.00        5991.00           0.00
      1701         0.5985       -6131.00        6131.00           0.00
      1702         0.5988       -5991.00        5991.00           0.00
      1703         0.5991       -6115.00        6115.00           0.00
      1704         0.5994       -6115.00        6115.00           0.00
      1705         0.5996       -6304.00        6304.00           0.00
      1706         0.5999       -6416.00        6416.00           0.00
      1707         0.6002       -6480.00        6480.00           0.00
      1708         0.6005       -6512.00        6512.00           0.00
      1709         0.6008       -6336.00        6336.00           0.00
      1710         0.6011       -6512.00        6512.00           0.00
      1711         0.6014       -6512.00        6512.00           0.00
      1712         0.6017       -6416.00        6416.00           0.00
      1713         0.6020       -6400.00        6400.00           0.00
      1714         0.6023       -6496.00        6496.00           0.00
      1715         0.6026       -6545.00        6545.00           0.00
      1716         0.6029       -6529.00        6529.00           0.00
      1717         0.6031       -6577.00        6577.00           0.00
      1718         0.6034       -6561.00        6561.00           0.00
      1719         0.6037       -6432.00        6432.00           0.00
      1720         0.6040       -6480.00        6480.00           0.00
      1721         0.6043       -6545.00        6545.00           0.00
      1722         0.6046       -6708.00        6708.00           0.00
      1723         0.6049       -6626.00        6626.00           0.00
      1724         0.6052       -6610.00        6610.00           0.00
      1725         0.6055       -6577.00        6577.00           0.00
      1726         0.6058       -6740.00        6740.00           0.00
      1727         0.6061       -6806.00        6806.00           0.00
      1728         0.6064       -6659.00        6659.00           0.00
      1729         0.6066       -6972.00        6972.00           0.00
      1730         0.6069       -6906.00        6906.00           0.00
      1731         0.6072       -6989.00        6989.00           0.00
      1732         0.6075       -6972.00        6972.00           0.00
      1733         0.6078       -7123.00        7123.00           0.00
      1734         0.6081       -7225.00        7225.00           0.00
      1735         0.6084       -7293.00        7293.00           0.00
      1736         0.6087       -7430.00        7430.00           0.00
      1737         0.6090       -7604.00        7604.00           0.00
      1738         0.6093       -7604.00        7604.00           0.00
      1739         0.6096       -7674.00        7674.00           0.00
      1740         0.6099       -7621.00        7621.00           0.00
      1741         0.6101       -7621.00        7621.00           0.00
      1742         0.6104       -7674.00        7674.00           0.00
      1743         0.6107       -7762.00        7762.00           0.00
      1744         0.6110       -7779.00        7779.00           0.00
      1745         0.6113       -7639.00        7639.00           0.00
      1746         0.6116       -7413.00        7413.00           0.00
      1747         0.6119       -7448.00        7448.00           0.00
      1748         0.6122       -7465.00        7465.00           0.00
      1749         0.6125       -7327.00        7327.00           0.00
      1750         0.6128       -7362.00        7362.00           0.00
      1751         0.6131       -7396.00        7396.00           0.00
      1752         0.6133       -7586.00        7586.00           0.00
      1753         0.6136       -7656.00        7656.00           0.00
      1754         0.6139       -7534.00        7534.00           0.00
      1755         0.6142       -7482.00        7482.00           0.00
      1756         0.6145       -7482.00        7482.00           0.00
      1757         0.6148       -7465.00        7465.00           0.00
      1758         0.6151       -7569.00        7569.00           0.00
      1759         0.6154       -7448.00        7448.00           0.00
      1760         0.6157       -7569.00        7569.00           0.00
      1761         0.6160       -7482.00        7482.00           0.00
      1762         0.6163       -7639.00        7639.00           0.00
      1763         0.6165       -7569.00        7569.00           0.00
      1764         0.6168       -7430.00        7430.00           0.00
      1765         0.6171       -7726.00        7726.00           0.00
      1766         0.6174       -7674.00        7674.00           0.00
      1767         0.6177       -7832.00        7832.00           0.00
      1768         0.6180       -7885.00        7885.00           0.00
      1769         0.6183       -7832.00        7832.00           0.00
      1770         0.6186       -8064.00        8064.00           0.00
      1771         0.6189       -8136.00        8136.00           0.00
      1772         0.6192       -8391.00        8391.00           0.00
      1773         0.6195       -8464.00        8464.00           0.00
      1774         0.6197       -8630.00        8630.00           0.00
      1775         0.6200       -8593.00        8593.00           0.00
      1776         0.6203       -8705.00        8705.00           0.00
      1777         0.6206       -8668.00        8668.00           0.00
      1778         0.6209       -8630.00        8630.00           0.00
      1779         0.6212       -8593.00        8593.00           0.00
      1780         0.6215       -8501.00        8501.00           0.00
      1781         0.6218       -8446.00        8446.00           0.00
      1782         0.6221       -8446.00        8446.00           0.00
      1783         0.6224       -8538.00        8538.00           0.00
      1784         0.6226       -8519.00        8519.00           0.00
      1785         0.6229       -8082.00        8082.00           0.00
      1786         0.6232       -8028.00        8028.00           0.00
      1787         0.6235       -8100.00        8100.00           0.00
      1788         0.6238       -7939.00        7939.00           0.00
      1789         0.6241       -8118.00        8118.00           0.00
      1790         0.6244       -7850.00        7850.00           0.00
      1791         0.6247       -7903.00        7903.00           0.00
      1792         0.6250       -7974.00        7974.00           0.00
      1793         0.6253       -7903.00        7903.00           0.00
      1794         0.6255       -7939.00        7939.00           0.00
      1795         0.6258       -7779.00        7779.00           0.00
      1796         0.6261       -7850.00        7850.00           0.00
      1797         0.6264       -7850.00        7850.00           0.00
      1798         0.6267       -7815.00        7815.00           0.00
      1799         0.6270       -7921.00        7921.00           0.00
      1800         0.6273       -7726.00        7726.00           0.00
      1801         0.6276       -7850.00        7850.00           0.00
      1802         0.6279       -7850.00        7850.00           0.00
      1803         0.6282       -7691.00        7691.00           0.00
      1804         0.6284       -7656.00        7656.00           0.00
      1805         0.6287       -7974.00        7974.00           0.00
      1806         0.6290       -7779.00        7779.00           0.00
      1807         0.6293       -7674.00        7674.00           0.00
      1808         0.6296       -7744.00        7744.00           0.00
      1809         0.6299       -7779.00        7779.00           0.00
      1810         0.6302       -7726.00        7726.00           0.00
      1811         0.6305       -7621.00        7621.00           0.00
      1812         0.6308       -7691.00        7691.00           0.00
      1813         0.6310       -7691.00        7691.00           0.00
      1814         0.6313       -7691.00        7691.00           0.00
      1815         0.6316       -7674.00        7674.00           0.00
      1816         0.6319       -7656.00        7656.00           0.00
      1817         0.6322       -7604.00        7604.00           0.00
      1818         0.6325       -7639.00        7639.00           0.00
      1819         0.6328       -7709.00        7709.00           0.00
      1820         0.6331       -7534.00        7534.00           0.00
      1821         0.6334       -7639.00        7639.00           0.00
      1822         0.6336       -7779.00        7779.00           0.00
      1823         0.6339       -7709.00        7709.00           0.00
      1824         0.6342       -7797.00        7797.00           0.00
      1825         0.6345       -7656.00        7656.00           0.00
      1826         0.6348       -7639.00        7639.00           0.00
      1827         0.6351       -7552.00        7552.00           0.00
      1828         0.6354       -7430.00        7430.00           0.00
      1829         0.6357       -7534.00        7534.00           0.00
      1830         0.6360       -7552.00        7552.00           0.00
      1831         0.6362       -7586.00        7586.00           0.00
      1832         0.6365       -7500.00        7500.00           0.00
      1833         0.6368       -7430.00        7430.00           0.00
      1834         0.6371       -7310.00        7310.00           0.00
      1835         0.6374       -7293.00        7293.00           0.00
      1836         0.6377       -7208.00        7208.00           0.00
      1837         0.6380       -7242.00        7242.00           0.00
      1838         0.6383       -7327.00        7327.00           0.00
      1839         0.6386       -7276.00        7276.00           0.00
      1840         0.6388       -7208.00        7208.00           0.00
      1841         0.6391       -7259.00        7259.00           0.00
      1842         0.6394       -7259.00        7259.00           0.00
      1843         0.6397       -7276.00        7276.00           0.00
      1844         0.6400       -7191.00        7191.00           0.00
      1845         0.6403       -7225.00        7225.00           0.00
      1846         0.6406       -7123.00        7123.00           0.00
      1847         0.6409       -7225.00        7225.00           0.00
      1848         0.6412       -7123.00        7123.00           0.00
      1849         0.6414       -7106.00        7106.00           0.00
      1850         0.6417       -7073.00        7073.00           0.00
      1851         0.6420       -7006.00        7006.00           0.00
      1852         0.6423       -6939.00        6939.00           0.00
      1853         0.6426       -6872.00        6872.00           0.00
      1854         0.6429       -6790.00        6790.00           0.00
      1855         0.6432       -6806.00        6806.00           0.00
      1856         0.6435       -6790.00        6790.00           0.00
      1857         0.6438       -6691.00        6691.00           0.00
      1858         0.6440       -6561.00        6561.00           0.00
      1859         0.6443       -6626.00        6626.00           0.00
      1860         0.6446       -6659.00        6659.00           0.00
      1861         0.6449       -6610.00        6610.00           0.00
      1862         0.6452       -6545.00        6545.00           0.00
      1863         0.6455       -6659.00        6659.00           0.00
      1864         0.6458       -6691.00        6691.00           0.00
      1865         0.6461       -6480.00        6480.00           0.00
      1866         0.6463       -6400.00        6400.00           0.00
      1867         0.6466       -6496.00        6496.00           0.00
      1868         0.6469       -6304.00        6304.00           0.00
      1869         0.6472       -6352.00        6352.00           0.00
      1870         0.6475       -6241.00        6241.00           0.00
      1871         0.6478       -6131.00        6131.00           0.00
      1872         0.6481       -6100.00        6100.00           0.00
      1873         0.6484       -6084.00        6084.00           0.00
      1874         0.6486       -6084.00        6084.00           0.00
      1875         0.6489       -6022.00        6022.00           0.00
      1876         0.6492       -5914.00        5914.00           0.00
      1877         0.6495       -5991.00        5991.00           0.00
      1878         0.6498       -5852.00        5852.00           0.00
      1879         0.6501       -5852.00        5852.00           0.00
      1880         0.6504       -5761.00        5761.00           0.00
      1881         0.6507       -5944.00        5944.00           0.00
      1882         0.6509       -5806.00        5806.00           0.00
      1883         0.6512       -5715.00        5715.00           0.00
      1884         0.6515       -5822.00        5822.00           0.00
      1885         0.6518       -5655.00        5655.00           0.00
      1886         0.6521       -5715.00        5715.00           0.00
      1887         0.6524       -5715.00        5715.00           0.00
      1888         0.6527       -5776.00        5776.00           0.00
      1889         0.6530       -5852.00        5852.00           0.00
      1890         0.6532       -5837.00        5837.00           0.00
      1891         0.6535       -5806.00        5806.00           0.00
      1892         0.6538       -5852.00        5852.00           0.00
      1893         0.6541       -5883.00        5883.00           0.00
      1894         0.6544       -5868.00        5868.00           0.00
      1895         0.6547       -5746.00        5746.00           0.00
      1896         0.6550       -5655.00        5655.00           0.00
      1897         0.6553       -5625.00        5625.00           0.00
      1898         0.6555       -5565.00        5565.00           0.00
      1899         0.6558       -5565.00        5565.00           0.00
      1900         0.6561       -5520.00        5520.00           0.00
      1901         0.6564       -5535.00        5535.00           0.00
      1902         0.6567       -5476.00        5476.00           0.00
      1903         0.6570       -5417.00        5417.00           0.00
      1904         0.6573       -5329.00        5329.00           0.00
      1905         0.6576       -5373.00        5373.00           0.00
      1906         0.6578       -5256.00        5256.00           0.00
      1907         0.6581       -5213.00        5213.00           0.00
      1908         0.6584       -5242.00        5242.00           0.00
      1909         0.6587       -5358.00        5358.00           0.00
      1910         0.6590       -5388.00        5388.00           0.00
      1911         0.6593       -5402.00        5402.00           0.00
      1912         0.6596       -5610.00        5610.00           0.00
      1913         0.6598       -5506.00        5506.00           0.00
      1914         0.6601       -5550.00        5550.00           0.00
      1915         0.6604       -5625.00        5625.00           0.00
      1916         0.6607       -5746.00        5746.00           0.00
      1917         0.6610       -5776.00        5776.00           0.00
      1918         0.6613       -5822.00        5822.00           0.00
      1919         0.6616       -5929.00        5929.00           0.00
      1920         0.6619       -5944.00        5944.00           0.00
      1921         0.6621       -5960.00        5960.00           0.00
      1922         0.6624       -5852.00        5852.00           0.00
      1923         0.6627       -5898.00        5898.00           0.00
      1924         0.6630       -5975.00        5975.00           0.00
      1925         0.6633       -5929.00        5929.00           0.00
      1926         0.6636       -5791.00        5791.00           0.00
      1927         0.6639       -5852.00        5852.00           0.00
      1928         0.6641       -5806.00        5806.00           0.00
      1929         0.6644       -5715.00        5715.00           0.00
      1930         0.6647       -5610.00        5610.00           0.00
      1931         0.6650       -5610.00        5610.00           0.00
      1932         0.6653       -5520.00        5520.00           0.00
      1933         0.6656       -5491.00        5491.00           0.00
      1934         0.6659       -5373.00        5373.00           0.00
      1935         0.6661       -5402.00        5402.00           0.00
      1936         0.6664       -5358.00        5358.00           0.00
      1937         0.6667       -5141.00        5141.00           0.00
      1938         0.6670       -5271.00        5271.00           0.00
      1939         0.6673       -5127.00        5127.00           0.00
      1940         0.6676       -5013.00        5013.00           0.00
      1941         0.6679       -4984.00        4984.00           0.00
      1942         0.6682       -4830.00        4830.00           0.00
      1943         0.6684       -5069.00        5069.00           0.00
      1944         0.6687       -4984.00        4984.00           0.00
      1945         0.6690       -4970.00        4970.00           0.00
      1946         0.6693       -4858.00        4858.00           0.00
      1947         0.6696       -5170.00        5170.00           0.00
      1948         0.6699       -4956.00        4956.00           0.00
      1949         0.6702       -5055.00        5055.00           0.00
      1950         0.6704       -5013.00        5013.00           0.00
      1951         0.6707       -5098.00        5098.00           0.00
      1952         0.6710        5112.00        4975.51          71.50
      1953         0.6713        5013.00        4973.31          70.80
      1954         0.6716        5013.00        4951.35          70.80
      1955         0.6719        5013.00        4913.80          70.80
      1956         0.6722        4928.00        4866.48          70.20
      1957         0.6724        4914.00        4815.54          70.10
      1958         0.6727        4830.00        4764.10          69.50
      1959         0.6730        4900.00        4716.31          70.00
      1960         0.6733        4886.00        4677.17          69.90
      1961         0.6736        4802.00        4650.55          69.30
      1962         0.6739        4858.00        4638.72          69.70
      1963         0.6742        4761.00        4641.40          69.00
      1964         0.6744        4747.00        4657.13          68.90
      1965         0.6747        4624.00        4679.40          68.00
      1966         0.6750        4638.00        4702.08          68.10
      1967         0.6753        4706.00        4718.01          68.60
      1968         0.6756        4583.00        4718.39          67.70
      1969         0.6759        4610.00        4702.06          67.90
      1970         0.6761        4638.00        4671.66          68.10
      1971         0.6764        4651.00        4630.52          68.20
      1972         0.6767        4476.00        4583.18          66.90
      1973         0.6770        4476.00        4528.37          66.90
      1974         0.6773        4369.00        4466.74          66.10
      1975         0.6776        4436.00        4400.21          66.60
      1976         0.6779        4369.00        4331.55          66.10
      1977         0.6781        4369.00        4263.78          66.10
      1978         0.6784        4303.00        4200.25          65.60
      1979         0.6787        4382.00        4143.62          66.20
      1980         0.6790        4356.00        4095.32          66.00
      1981         0.6793        4330.00        4055.46          65.80
      1982         0.6796        4264.00        4022.44          65.30
      1983         0.6799        4277.00        3994.16          65.40
      1984         0.6801        4173.00        3967.35          64.60
      1985         0.6804        4186.00        3945.66          64.70
      1986         0.6807        4096.00        3928.23          64.00
      1987         0.6810        4020.00        3915.61          63.40
      1988         0.6813        4045.00        3907.47          63.60
      1989         0.6816        4020.00        3903.50          63.40
      1990         0.6818        3994.00        3901.92          63.20
      1991         0.6821        3944.00        3903.95          62.80
      1992         0.6824        3906.00        3908.63          62.50
      1993         0.6827        3894.00        3915.13          62.40
      1994         0.6830        3881.00        3923.68          62.30
      1995         0.6833        3881.00        3931.88          62.30
      1996         0.6836        3819.00        3937.77          61.80
      1997         0.6838        3770.00        3934.57          61.40
      1998         0.6841        3733.00        3928.81          61.10
      1999         0.6844        3721.00        3916.37          61.00
      2000         0.6847        3770.00        3896.87          61.40
      2001         0.6850        3832.00        3872.94          61.90
      2002         0.6853        3770.00        3846.98          61.40
      2003         0.6855        3782.00        3820.04          61.50
      2004         0.6858        3770.00        3793.99          61.40
      2005         0.6861        3869.00        3771.84          62.20
      2006         0.6864        3832.00        3752.52          61.90
      2007         0.6867        3931.00        3735.68          62.70
      2008         0.6870        3733.00        3720.07          61.10
      2009         0.6873        3919.00        3704.18          62.60
      2010         0.6875        3969.00        3687.44          63.00
      2011         0.6878        4007.00        3669.99          63.30
      2012         0.6881        3982.00        3651.30          63.10
      2013         0.6884        4096.00        3634.58          64.00
      2014         0.6887        4109.00        3619.15          64.10
      2015         0.6890        4122.00        3608.43          64.20
      2016         0.6892        4147.00        3597.16          64.40
      2017         0.6895        4134.00        3588.93          64.30
      2018         0.6898        4109.00        3583.97          64.10
      2019         0.6901        4173.00        3581.00          64.60
      2020         0.6904        4173.00        3580.49          64.60
      2021         0.6907        4134.00        3577.12          64.30
      2022         0.6909        4199.00        3568.34          64.80
      2023         0.6912        4147.00        3550.11          64.40
      2024         0.6915        4109.00        3529.12          64.10
      2025         0.6918        4045.00        3504.20          63.60
      2026         0.6921        4045.00        3475.40          63.60
      2027         0.6924        4147.00        3448.17          64.40
      2028         0.6926        3931.00        3420.98          62.70
      2029         0.6929        4007.00        3397.10          63.30
      2030         0.6932        3919.00        3370.17          62.60
      2031         0.6935        3807.00        3347.06          61.70
      2032         0.6938        3770.00        3326.05          61.40
      2033         0.6941        3881.00        3309.87          62.30
      2034         0.6944        3672.00        3296.48          60.60
      2035         0.6946        3624.00        3287.41          60.20
      2036         0.6949        3588.00        3281.85          59.90
      2037         0.6952        3576.00        3280.44          59.80
      2038         0.6955        3528.00        3284.00          59.40
      2039         0.6958        3528.00        3293.50          59.40
      2040         0.6961        3481.00        3307.40          59.00
      2041         0.6963        3469.00        3329.37          58.90
      2042         0.6966        3493.00        3356.53          59.10
      2043         0.6969        3434.00        3387.14          58.60
      2044         0.6972        3434.00        3419.51          58.60
      2045         0.6975        3364.00        3444.17          58.00
      2046         0.6978        3399.00        3459.95          58.30
      2047         0.6980        3446.00        3464.35          58.70
      2048         0.6983        3341.00        3459.94          57.80
      2049         0.6986        3387.00        3447.66          58.20
      2050         0.6989        3387.00        3429.67          58.20
      2051         0.6992        3364.00        3408.73          58.00
      2052         0.6995        3364.00        3384.30          58.00
      2053         0.6997        3306.00        3356.71          57.50
      2054         0.7000        3318.00        3328.09          57.60
      2055         0.7003        3249.00        3299.09          57.00
      2056         0.7006        3215.00        3269.67          56.70
      2057         0.7009        3181.00        3242.14          56.40
      2058         0.7011        3215.00        3216.76          56.70
      2059         0.7014        3047.00        3191.31          55.20
      2060         0.7017        3102.00        3166.65          55.70
      2061         0.7020        3102.00        3143.13          55.70
      2062         0.7023        3025.00        3121.79          55.00
      2063         0.7026        3058.00        3102.80          55.30
      2064         0.7028        3069.00        3086.49          55.40
      2065         0.7031        3091.00        3072.35          55.60
      2066         0.7034        3014.00        3061.30          54.90
      2067         0.7037        3047.00        3053.53          55.20
      2068         0.7040        2970.00        3049.05          54.50
      2069         0.7043        3136.00        3048.43          56.00
      2070         0.7045        3136.00        3051.17          56.00
      2071         0.7048        3058.00        3056.36          55.30
      2072         0.7051        3114.00        3065.24          55.80
      2073         0.7054        2938.00        3078.62          54.20
      2074         0.7057        3058.00        3097.07          55.30
      2075         0.7060        3091.00        3121.30          55.60
      2076         0.7062        3114.00        3153.38          55.80
      2077         0.7065        3136.00        3192.36          56.00
      2078         0.7068        3158.00        3235.48          56.20
      2079         0.7071        3080.00        3276.86          55.50
      2080         0.7074        3091.00        3310.63          55.60
      2081         0.7076        3114.00        3331.68          55.80
      2082         0.7079        3147.00        3340.07          56.10
      2083         0.7082        3069.00        3337.38          55.40
      2084         0.7085        3025.00        3333.11          55.00
      2085         0.7088        3014.00        3316.10          54.90
      2086         0.7091        3025.00        3294.63          55.00
      2087         0.7093        3047.00        3268.52          55.20
      2088         0.7096        2992.00        3240.05          54.70
      2089         0.7099        3058.00        3210.57          55.30
      2090         0.7102        3091.00        3181.05          55.60
      2091         0.7105        3102.00        3152.45          55.70
      2092         0.7108        3036.00        3126.46          55.10
      2093         0.7110        3069.00        3101.09          55.40
      2094         0.7113        3069.00        3078.46          55.40
      2095         0.7116        3125.00        3058.35          55.90
      2096         0.7119        3091.00        3040.16          55.60
      2097         0.7122        3025.00        3025.12          55.00
      2098         0.7124        3080.00        3013.93          55.50
      2099         0.7127        3158.00        3001.90          56.20
      2100         0.7130        3136.00        2988.98          56.00
      2101         0.7133        3058.00        2975.42          55.30
      2102         0.7136        3036.00        2959.95          55.10
      2103         0.7139        2959.00        2943.00          54.40
      2104         0.7141        2970.00        2926.47          54.50
      2105         0.7144        2992.00        2909.11          54.70
      2106         0.7147        2927.00        2892.41          54.10
      2107         0.7150        2905.00        2877.36          53.90
      2108         0.7153        2916.00        2870.71          54.00
      2109         0.7155        2873.00        2859.78          53.60
      2110         0.7158        2788.00        2851.23          52.80
      2111         0.7161        2862.00        2845.62          53.50
      2112         0.7164        2905.00        2843.32          53.90
      2113         0.7167        2820.00        2845.04          53.10
      2114         0.7170        2788.00        2851.86          52.80
      2115         0.7172        2788.00        2863.93          52.80
      2116         0.7175        2841.00        2881.99          53.30
      2117         0.7178        2798.00        2905.43          52.90
      2118         0.7181        2788.00        2932.48          52.80
      2119         0.7184        2809.00        2960.42          53.00
      2120         0.7186        2927.00        2986.66          54.10
      2121         0.7189        2830.00        3009.91          53.20
      2122         0.7192        2905.00        3028.73          53.90
      2123         0.7195        2798.00        3047.01          52.90
      2124         0.7198        2948.00        3062.67          54.30
      2125         0.7200        2916.00        3075.21          54.00
      2126         0.7203        2992.00        3082.34          54.70
      2127         0.7206        2970.00        3082.36          54.50
      2128         0.7209        2948.00        3074.60          54.30
      2129         0.7212        2970.00        3060.13          54.50
      2130         0.7215        3025.00        3040.57          55.00
      2131         0.7217        3114.00        3017.13          55.80
      2132         0.7220        3058.00        2990.69          55.30
      2133         0.7223        2981.00        2962.32          54.60
      2134         0.7226        3102.00        2933.04          55.70
      2135         0.7229        2948.00        2905.02          54.30
      2136         0.7231        2959.00        2878.02          54.40
      2137         0.7234        2938.00        2854.55          54.20
      2138         0.7237        2970.00        2836.18          54.50
      2139         0.7240        2884.00        2827.83          53.70
      2140         0.7243        2894.00        2825.37          53.80
      2141         0.7245        2862.00        2833.04          53.50
      2142         0.7248        2884.00        2849.89          53.70
      2143         0.7251        2905.00        2875.57          53.90
      2144         0.7254        2927.00        2907.14          54.10
      2145         0.7257        3003.00        2940.09          54.80
      2146         0.7259        2981.00        2975.48          54.60
      2147         0.7262        3036.00        3008.15          55.10
      2148         0.7265        3136.00        3040.34          56.00
      2149         0.7268        3238.00        3073.15          56.90
      2150         0.7271        3283.00        3106.45          57.30
      2151         0.7274        3376.00        3140.58          58.10
      2152         0.7276        3295.00        3173.13          57.40
      2153         0.7279        3341.00        3206.03          57.80
      2154         0.7282        3528.00        3234.91          59.40
      2155         0.7285        3422.00        3265.02          58.50
      2156         0.7288        3329.00        3299.83          57.70
      2157         0.7290        3469.00        3340.87          58.90
      2158         0.7293        3552.00        3389.09          59.60
      2159         0.7296        3564.00        3442.64          59.70
      2160         0.7299        3624.00        3497.65          60.20
      2161         0.7302        3672.00        3546.98          60.60
      2162         0.7304        3624.00        3582.56          60.20
      2163         0.7307        3648.00        3593.86          60.40
      2164         0.7310        3672.00        3576.66          60.60
      2165         0.7313        3552.00        3532.62          59.60
      2166         0.7316        3505.00        3470.46          59.20
      2167         0.7318        3411.00        3401.56          58.40
      2168         0.7321        3364.00        3332.23          58.00
      2169         0.7324        3226.00        3265.71          56.80
      2170         0.7327        3147.00        3202.43          56.10
      2171         0.7330        3069.00        3142.23          55.40
      2172         0.7332        2981.00        3087.22          54.60
      2173         0.7335        2862.00        3038.07          53.50
      2174         0.7338        2905.00        2995.77          53.90
      2175         0.7341        2767.00        2961.42          52.60
      2176         0.7344        2756.00        2938.27          52.50
      2177         0.7346        2714.00        2922.75          52.10
      2178         0.7349        2683.00        2916.35          51.80
      2179         0.7352        2756.00        2916.75          52.50
      2180         0.7355        2621.00        2920.09          51.20
      2181         0.7358        2683.00        2922.13          51.80
      2182         0.7360        2694.00        2920.11          51.90
      2183         0.7363        2704.00        2912.32          52.00
      2184         0.7366        2611.00        2896.79          51.10
      2185         0.7369        2642.00        2873.96          51.40
      2186         0.7372        2570.00        2843.82          50.70
      2187         0.7374        2500.00        2808.20          50.00
      2188         0.7377        2490.00        2767.72          49.90
      2189         0.7380        2470.00        2725.97          49.70
      2190         0.7383        2480.00        2679.13          49.80
      2191         0.7386        2450.00        2630.76          49.50
      2192         0.7388        2372.00        2582.31          48.70
      2193         0.7391        2372.00        2535.04          48.70
      2194         0.7394        2362.00        2490.91          48.60
      2195         0.7397        2304.00        2450.47          48.00
      2196         0.7400        2190.00        2416.96          46.80
      2197         0.7402        2275.00        2390.73          47.70
      2198         0.7405        2256.00        2373.37          47.50
      2199         0.7408        2256.00        2367.22          47.50
      2200         0.7411        2285.00        2371.43          47.80
      2201         0.7413        2266.00        2387.68          47.60
      2202         0.7416        2323.00        2417.26          48.20
      2203         0.7419        2362.00        2459.84          48.60
      2204         0.7422        2440.00        2512.56          49.40
      2205         0.7425        2450.00        2570.75          49.50
      2206         0.7427        2500.00        2636.17          50.00
      2207         0.7430        2500.00        2684.99          50.00
      2208         0.7433        2540.00        2723.31          50.40
      2209         0.7436        2581.00        2747.21          50.80
      2210         0.7439        2673.00        2761.32          51.70
      2211         0.7441        2601.00        2770.06          51.00
      2212         0.7444        2642.00        2776.20          51.40
      2213         0.7447        2652.00        2782.38          51.50
      2214         0.7450        2777.00        2788.75          52.70
      2215         0.7453        2767.00        2793.79          52.60
      2216         0.7455        2788.00        2794.02          52.80
      2217         0.7458        2777.00        2789.67          52.70
      2218         0.7461        2820.00        2779.74          53.10
      2219         0.7464        2809.00        2767.05          53.00
      2220         0.7466        2873.00        2755.26          53.60
      2221         0.7469        2852.00        2746.00          53.40
      2222         0.7472        2862.00        2739.06          53.50
      2223         0.7475        2809.00        2730.09          53.00
      2224         0.7478        2767.00        2715.82          52.60
      2225         0.7480        2767.00        2693.79          52.60
      2226         0.7483        2756.00        2665.67          52.50
      2227         0.7486        2767.00        2633.98          52.60
      2228         0.7489        2725.00        2602.68          52.20
      2229         0.7492        2652.00        2571.70          51.50
      2230         0.7494        2621.00        2545.77          51.20
      2231         0.7497        2642.00        2522.62          51.40
      2232         0.7500        2632.00        2504.52          51.30
      2233         0.7503        2500.00        2484.57          50.00
      2234         0.7505        2470.00        2464.25          49.70
      2235         0.7508        2500.00        2443.57          50.00
      2236         0.7511        2450.00        2422.27          49.50
      2237         0.7514        2490.00        2404.74          49.90
      2238         0.7517        2450.00        2392.36          49.50
      2239         0.7519        2440.00        2386.95          49.40
      2240         0.7522        2440.00        2387.22          49.40
      2241         0.7525        2401.00        2392.78          49.00
      2242         0.7528        2372.00        2399.80          48.70
      2243         0.7531        2430.00        2404.44          49.29
      2244         0.7533        2421.00        2402.98          49.20
      2245         0.7536        2430.00        2393.39          49.29
      2246         0.7539        2362.00        2375.79          48.60
      2247         0.7542        2314.00        2352.11          48.10
      2248         0.7544        2333.00        2325.86          48.30
      2249         0.7547        2304.00        2298.74          48.00
      2250         0.7550        2266.00        2271.20          47.60
      2251         0.7553        2247.00        2245.20          47.40
      2252         0.7556        2172.00        2221.97          46.60
      2253         0.7558        2144.00        2198.71          46.30
      2254         0.7561        2172.00        2177.60          46.60
      2255         0.7564        2116.00        2159.75          46.00
      2256         0.7567        2079.00        2145.69          45.60
      2257         0.7569        2190.00        2137.57          46.80
      2258         0.7572        2162.00        2138.54          46.50
      2259         0.7575        2134.00        2149.77          46.20
      2260         0.7578        2107.00        2172.13          45.90
      2261         0.7581        2162.00        2209.93          46.50
      2262         0.7583        2134.00        2256.35          46.20
      2263         0.7586        2256.00        2310.67          47.50
      2264         0.7589        2333.00        2370.18          48.30
      2265         0.7592        2391.00        2425.54          48.90
      2266         0.7594        2500.00        2473.87          50.00
      2267         0.7597        2540.00        2513.48          50.40
      2268         0.7600        2601.00        2547.00          51.00
      2269         0.7603        2601.00        2577.30          51.00
      2270         0.7606        2581.00        2607.63          50.80
      2271         0.7608        2642.00        2639.87          51.40
      2272         0.7611        2683.00        2673.41          51.80
      2273         0.7614        2683.00        2707.42          51.80
      2274         0.7617        2714.00        2739.88          52.10
      2275         0.7619        2788.00        2768.36          52.80
      2276         0.7622        2746.00        2790.12          52.40
      2277         0.7625        2820.00        2805.35          53.10
      2278         0.7628        2894.00        2813.52          53.80
      2279         0.7631        2916.00        2816.97          54.00
      2280         0.7633        2916.00        2819.62          54.00
      2281         0.7636        2927.00        2819.28          54.10
      2282         0.7639        2959.00        2815.33          54.40
      2283         0.7642        2830.00        2805.30          53.20
      2284         0.7644        2830.00        2788.80          53.20
      2285         0.7647        2938.00        2764.53          54.20
      2286         0.7650        2916.00        2731.84          54.00
      2287         0.7653        2809.00        2692.08          53.00
      2288         0.7655        2798.00        2645.82          52.90
      2289         0.7658        2746.00        2594.81          52.40
      2290         0.7661        2777.00        2542.95          52.70
      2291         0.7664        2673.00        2493.55          51.70
      2292         0.7667        2560.00        2447.56          50.60
      2293         0.7669        2570.00        2405.29          50.70
      2294         0.7672        2440.00        2366.02          49.40
      2295         0.7675        2411.00        2332.15          49.10
      2296         0.7678        2440.00        2300.27          49.40
      2297         0.7680        2421.00        2272.47          49.20
      2298         0.7683        2362.00        2248.63          48.60
      2299         0.7686        2401.00        2227.12          49.00
      2300         0.7689        2391.00        2205.13          48.90
      2301         0.7691        2285.00        2179.39          47.80
      2302         0.7694        2266.00        2149.32          47.60
      2303         0.7697        2181.00        2115.01          46.70
      2304         0.7700        2209.00        2083.82          47.00
      2305         0.7703        2134.00        2048.13          46.20
      2306         0.7705        2125.00        2014.35          46.10
      2307         0.7708        2088.00        1982.68          45.69
      2308         0.7711        2070.00        1952.70          45.50
      2309         0.7714        2043.00        1923.99          45.20
      2310         0.7716        1954.00        1897.48          44.20
      2311         0.7719        1971.00        1876.11          44.40
      2312         0.7722        1989.00        1856.58          44.60
      2313         0.7725        1989.00        1839.30          44.60
      2314         0.7727        1945.00        1827.49          44.10
      2315         0.7730        1927.00        1818.52          43.90
      2316         0.7733        1892.00        1811.65          43.50
      2317         0.7736        1892.00        1805.88          43.50
      2318         0.7738        1875.00        1800.75          43.30
      2319         0.7741        1962.00        1795.30          44.29
      2320         0.7744        1954.00        1789.09          44.20
      2321         0.7747        1962.00        1783.63          44.29
      2322         0.7750        1892.00        1777.55          43.50
      2323         0.7752        1875.00        1771.32          43.30
      2324         0.7755        1858.00        1765.13          43.10
      2325         0.7758        1858.00        1759.21          43.10
      2326         0.7761        1875.00        1753.16          43.30
      2327         0.7763        1815.00        1747.57          42.60
      2328         0.7766        1832.00        1741.95          42.80
      2329         0.7769        1815.00        1736.84          42.60
      2330         0.7772        1858.00        1731.50          43.10
      2331         0.7774        1858.00        1727.33          43.10
      2332         0.7777        1832.00        1725.01          42.80
      2333         0.7780        1840.00        1724.65          42.90
      2334         0.7783        1832.00        1725.97          42.80
      2335         0.7785        1798.00        1728.86          42.40
      2336         0.7788        1764.00        1741.22          42.00
      2337         0.7791        1823.00        1744.74          42.70
      2338         0.7794        1832.00        1748.29          42.80
      2339         0.7796        1866.00        1751.83          43.20
      2340         0.7799        1875.00        1756.09          43.30
      2341         0.7802        1875.00        1761.33          43.30
      2342         0.7805        1866.00        1768.93          43.20
      2343         0.7807        1866.00        1779.55          43.20
      2344         0.7810        1798.00        1792.62          42.40
      2345         0.7813        1866.00        1808.60          43.20
      2346         0.7816        1798.00        1826.48          42.40
      2347         0.7819        1823.00        1846.04          42.70
      2348         0.7821        1815.00        1870.04          42.60
      2349         0.7824        1945.00        1888.89          44.10
      2350         0.7827        1884.00        1907.87          43.41
      2351         0.7830        1910.00        1927.48          43.70
      2352         0.7832        1892.00        1941.18          43.50
      2353         0.7835        1823.00        1950.49          42.70
      2354         0.7838        1823.00        1957.53          42.70
      2355         0.7841        1815.00        1958.60          42.60
      2356         0.7843        1840.00        1955.30          42.90
      2357         0.7846        1910.00        1950.00          43.70
      2358         0.7849        1840.00        1942.99          42.90
      2359         0.7852        1875.00        1934.44          43.30
      2360         0.7854        1918.00        1924.76          43.79
      2361         0.7857        1892.00        1914.18          43.50
      2362         0.7860        1884.00        1902.76          43.41
      2363         0.7863        1901.00        1890.86          43.60
      2364         0.7865        1910.00        1879.40          43.70
      2365         0.7868        1884.00        1867.80          43.41
      2366         0.7871        1884.00        1858.33          43.41
      2367         0.7874        1892.00        1850.32          43.50
      2368         0.7876        1910.00        1843.74          43.70
      2369         0.7879        1901.00        1839.13          43.60
      2370         0.7882        1927.00        1833.96          43.90
      2371         0.7885        1918.00        1830.43          43.79
      2372         0.7887        1849.00        1828.00          43.00
      2373         0.7890        1858.00        1828.66          43.10
      2374         0.7893        1892.00        1832.18          43.50
      2375         0.7896        1962.00        1842.86          44.29
      2376         0.7898        1962.00        1860.75          44.29
      2377         0.7901        1971.00        1886.70          44.40
      2378         0.7904        2034.00        1921.23          45.10
      2379         0.7907        1936.00        1963.94          44.00
      2380         0.7909        2107.00        2014.23          45.90
      2381         0.7912        2125.00        2068.43          46.10
      2382         0.7915        2144.00        2122.85          46.30
      2383         0.7918        2162.00        2175.18          46.50
      2384         0.7920        2228.00        2220.74          47.20
      2385         0.7923        2323.00        2257.18          48.20
      2386         0.7926        2362.00        2284.04          48.60
      2387         0.7929        2352.00        2304.33          48.50
      2388         0.7931        2314.00        2312.35          48.10
      2389         0.7934        2323.00        2311.41          48.20
      2390         0.7937        2323.00        2304.12          48.20
      2391         0.7940        2372.00        2291.57          48.70
      2392         0.7942        2352.00        2278.12          48.50
      2393         0.7945        2275.00        2260.76          47.70
      2394         0.7948        2275.00        2243.73          47.70
      2395         0.7950        2294.00        2227.51          47.90
      2396         0.7953        2285.00        2213.49          47.80
      2397         0.7956        2304.00        2201.78          48.00
      2398         0.7959        2275.00        2191.88          47.70
      2399         0.7961        2285.00        2183.41          47.80
      2400         0.7964        2343.00        2176.62          48.40
      2401         0.7967        2266.00        2172.46          47.60
      2402         0.7970        2294.00        2172.61          47.90
      2403         0.7972        2323.00        2179.23          48.20
      2404         0.7975        2218.00        2193.64          47.10
      2405         0.7978        2391.00        2217.53          48.90
      2406         0.7981        2440.00        2250.58          49.40
      2407         0.7983        2430.00        2291.80          49.29
      2408         0.7986        2480.00        2339.12          49.80
      2409         0.7989        2550.00        2390.04          50.50
      2410         0.7992        2611.00        2441.69          51.10
      2411         0.7994        2642.00        2493.01          51.40
      2412         0.7997        2756.00        2542.66          52.50
      2413         0.8000        2725.00        2589.95          52.20
      2414         0.8003        2905.00        2634.37          53.90
      2415         0.8005        2970.00        2677.99          54.50
      2416         0.8008        3003.00        2716.92          54.80
      2417         0.8011        3036.00        2752.65          55.10
      2418         0.8014        3058.00        2783.74          55.30
      2419         0.8016        3091.00        2809.40          55.60
      2420         0.8019        3036.00        2829.53          55.10
      2421         0.8022        3058.00        2839.95          55.30
      2422         0.8024        3058.00        2842.10          55.30
      2423         0.8027        3102.00        2837.59          55.70
      2424         0.8030        3158.00        2828.79          56.20
      2425         0.8033        3036.00        2818.90          55.10
      2426         0.8035        2981.00        2810.59          54.60
      2427         0.8038        2938.00        2805.33          54.20
      2428         0.8041        2873.00        2802.88          53.60
      2429         0.8044        2841.00        2801.27          53.30
      2430         0.8046        2830.00        2797.20          53.20
      2431         0.8049        2841.00        2787.04          53.30
      2432         0.8052        2873.00        2768.37          53.60
      2433         0.8055        2788.00        2740.98          52.80
      2434         0.8057        2725.00        2706.79          52.20
      2435         0.8060        2560.00        2668.81          50.60
      2436         0.8063        2540.00        2629.90          50.40
      2437         0.8066        2480.00        2591.83          49.80
      2438         0.8068        2411.00        2554.68          49.10
      2439         0.8071        2520.00        2519.13          50.20
      2440         0.8074        2401.00        2484.06          49.00
      2441         0.8076        2323.00        2452.20          48.20
      2442         0.8079        2294.00        2417.19          47.90
      2443         0.8082        2323.00        2381.09          48.20
      2444         0.8085        2247.00        2343.19          47.40
      2445         0.8087        2294.00        2302.09          47.90
      2446         0.8090        2228.00        2256.38          47.20
      2447         0.8093        2200.00        2206.14          46.90
      2448         0.8096        2181.00        2153.44          46.70
      2449         0.8098        2144.00        2100.28          46.30
      2450         0.8101        2116.00        2048.47          46.00
      2451         0.8104        2070.00        1998.77          45.50
      2452         0.8106        2043.00        1953.30          45.20
      2453         0.8109        2016.00        1911.27          44.90
      2454         0.8112        1936.00        1872.69          44.00
      2455         0.8115        1927.00        1838.54          43.90
      2456         0.8117        1954.00        1809.98          44.20
      2457         0.8120        1998.00        1787.97          44.70
      2458         0.8123        1936.00        1772.34          44.00
      2459         0.8126        1971.00        1763.01          44.40
      2460         0.8128        2007.00        1758.98          44.80
      2461         0.8131        2025.00        1757.35          45.00
      2462         0.8134        2034.00        1758.81          45.10
      2463         0.8136        2061.00        1762.49          45.40
      2464         0.8139        2043.00        1770.59          45.20
      2465         0.8142        2043.00        1780.52          45.20
      2466         0.8145        2007.00        1793.75          44.80
      2467         0.8147        1945.00        1809.35          44.10
      2468         0.8150        1971.00        1825.28          44.40
      2469         0.8153        1962.00        1839.04          44.29
      2470         0.8156        1971.00        1850.14          44.40
      2471         0.8158        2061.00        1858.58          45.40
      2472         0.8161        1989.00        1863.67          44.60
      2473         0.8164        2007.00        1867.55          44.80
      2474         0.8166        2016.00        1869.99          44.90
      2475         0.8169        2052.00        1873.16          45.30
      2476         0.8172        2016.00        1876.49          44.90
      2477         0.8175        2052.00        1879.88          45.30
      2478         0.8177        2043.00        1881.67          45.20
      2479         0.8180        1971.00        1883.68          44.40
      2480         0.8183        2079.00        1884.66          45.60
      2481         0.8186        2079.00        1884.25          45.60
      2482         0.8188        2043.00        1882.58          45.20
      2483         0.8191        2079.00        1880.78          45.60
      2484         0.8194        2061.00        1879.36          45.40
      2485         0.8196        2070.00        1878.98          45.50
      2486         0.8199        1971.00        1879.47          44.40
      2487         0.8202        2025.00        1881.24          45.00
      2488         0.8205        2034.00        1883.56          45.10
      2489         0.8207        2025.00        1883.08          45.00
      2490         0.8210        1971.00        1879.95          44.40
      2491         0.8213        1980.00        1873.61          44.50
      2492         0.8215        1962.00        1859.48          44.29
      2493         0.8218        1954.00        1842.06          44.20
      2494         0.8221        1927.00        1822.54          43.90
      2495         0.8224        1901.00        1801.49          43.60
      2496         0.8226        1832.00        1781.59          42.80
      2497         0.8229        1832.00        1762.37          42.80
      2498         0.8232        1832.00        1745.89          42.80
      2499         0.8234        1849.00        1731.24          43.00
      2500         0.8237        1884.00        1717.85          43.41
      2501         0.8240        1832.00        1709.51          42.80
      2502         0.8243        1849.00        1707.80          43.00
      2503         0.8245        1884.00        1708.98          43.41
      2504         0.8248        1875.00        1715.65          43.30
      2505         0.8251        1866.00        1727.88          43.20
      2506         0.8253        2025.00        1745.21          45.00
      2507         0.8256        1875.00        1765.86          43.30
      2508         0.8259        1927.00        1789.77          43.90
      2509         0.8262        1936.00        1816.68          44.00
      2510         0.8264        2034.00        1845.98          45.10
      2511         0.8267        2052.00        1876.74          45.30
      2512         0.8270        2007.00        1907.25          44.80
      2513         0.8272        2034.00        1939.24          45.10
      2514         0.8275        2070.00        1970.27          45.50
      2515         0.8278        2098.00        1998.81          45.80
      2516         0.8281        2061.00        2024.40          45.40
      2517         0.8283        2070.00        2046.20          45.50
      2518         0.8286        2125.00        2063.87          46.10
      2519         0.8289        2134.00        2079.69          46.20
      2520         0.8291        1980.00        2088.45          44.50
      2521         0.8294        2116.00        2093.10          46.00
      2522         0.8297        2079.00        2091.45          45.60
      2523         0.8300        2079.00        2084.03          45.60
      2524         0.8302        2007.00        2070.90          44.80
      2525         0.8305        1971.00        2050.73          44.40
      2526         0.8308        2007.00        2025.94          44.80
      2527         0.8310        1962.00        1999.48          44.29
      2528         0.8313        1998.00        1973.19          44.70
      2529         0.8316        1980.00        1947.67          44.50
      2530         0.8319        2016.00        1924.19          44.90
      2531         0.8321        1954.00        1905.06          44.20
      2532         0.8324        1918.00        1888.80          43.79
      2533         0.8327        1910.00        1874.16          43.70
      2534         0.8329        1875.00        1860.85          43.30
      2535         0.8332        1884.00        1849.27          43.41
      2536         0.8335        1884.00        1840.63          43.41
      2537         0.8338        1918.00        1835.12          43.79
      2538         0.8340        1901.00        1834.93          43.60
      2539         0.8343        1936.00        1842.32          44.00
      2540         0.8346        1823.00        1856.80          42.70
      2541         0.8348        1756.00        1877.09          41.90
      2542         0.8351        1892.00        1899.85          43.50
      2543         0.8354        1798.00        1923.12          42.40
      2544         0.8357        1789.00        1937.46          42.30
      2545         0.8359        1840.00        1939.49          42.90
      2546         0.8362        1789.00        1929.87          42.30
      2547         0.8365        1798.00        1910.03          42.40
      2548         0.8367        1815.00        1884.27          42.60
      2549         0.8370        1747.00        1855.30          41.80
      2550         0.8373        1747.00        1826.12          41.80
      2551         0.8375        1665.00        1794.25          40.80
      2552         0.8378        1697.00        1761.55          41.19
      2553         0.8381        1648.00        1727.15          40.60
      2554         0.8384        1608.00        1691.05          40.10
      2555         0.8386        1640.00        1654.26          40.50
      2556         0.8389        1560.00        1618.73          39.50
      2557         0.8392        1592.00        1585.63          39.90
      2558         0.8394        1568.00        1556.10          39.60
      2559         0.8397        1544.00        1530.51          39.29
      2560         0.8400        1475.00        1510.17          38.41
      2561         0.8402        1568.00        1495.01          39.60
      2562         0.8405        1452.00        1484.91          38.11
      2563         0.8408        1490.00        1479.56          38.60
      2564         0.8411        1467.00        1478.38          38.30
      2565         0.8413        1452.00        1480.08          38.11
      2566         0.8416        1444.00        1484.86          38.00
      2567         0.8419        1444.00        1491.37          38.00
      2568         0.8421        1505.00        1497.98          38.79
      2569         0.8424        1475.00        1506.72          38.41
      2570         0.8427        1452.00        1516.79          38.11
      2571         0.8430        1521.00        1528.59          39.00
      2572         0.8432        1498.00        1542.61          38.70
      2573         0.8435        1513.00        1562.28          38.90
      2574         0.8438        1459.00        1581.76          38.20
      2575         0.8440        1498.00        1603.92          38.70
      2576         0.8443        1568.00        1627.83          39.60
      2577         0.8446        1584.00        1656.08          39.80
      2578         0.8448        1490.00        1682.63          38.60
      2579         0.8451        1537.00        1708.48          39.20
      2580         0.8454        1584.00        1733.03          39.80
      2581         0.8456        1568.00        1755.78          39.60
      2582         0.8459        1648.00        1776.79          40.60
      2583         0.8462        1552.00        1796.82          39.40
      2584         0.8465        1592.00        1816.78          39.90
      2585         0.8467        1608.00        1837.48          40.10
      2586         0.8470        1560.00        1859.11          39.50
      2587         0.8473        1600.00        1881.42          40.00
      2588         0.8475        1624.00        1903.28          40.30
      2589         0.8478        1640.00        1923.18          40.50
      2590         0.8481        1656.00        1940.23          40.69
      2591         0.8483        1706.00        1953.89          41.30
      2592         0.8486        1731.00        1963.80          41.61
      2593         0.8489        1714.00        1972.90          41.40
      2594         0.8492        1747.00        1981.71          41.80
      2595         0.8494        1722.00        1991.91          41.50
      2596         0.8497        1714.00        2003.78          41.40
      2597         0.8500        1849.00        2019.05          43.00
      2598         0.8502        1849.00        2035.39          43.00
      2599         0.8505        1739.00        2053.05          41.70
      2600         0.8508        1806.00        2074.10          42.50
      2601         0.8510        1945.00        2092.16          44.10
      2602         0.8513        1927.00        2108.68          43.90
      2603         0.8516        1936.00        2122.86          44.00
      2604         0.8518        1989.00        2133.32          44.60
      2605         0.8521        1962.00        2140.32          44.29
      2606         0.8524        1910.00        2142.74          43.70
      2607         0.8527        2025.00        2141.23          45.00
      2608         0.8529        1980.00        2136.49          44.50
      2609         0.8532        2043.00        2130.36          45.20
      2610         0.8535        1998.00        2120.06          44.70
      2611         0.8537        2016.00        2108.15          44.90
      2612         0.8540        1980.00        2093.87          44.50
      2613         0.8543        1998.00        2077.13          44.70
      2614         0.8545        1962.00        2059.02          44.29
      2615         0.8548        1980.00        2040.29          44.50
      2616         0.8551        1980.00        2020.35          44.50
      2617         0.8553        1927.00        2000.98          43.90
      2618         0.8556        1936.00        1984.18          44.00
      2619         0.8559        1936.00        1969.22          44.00
      2620         0.8561        1884.00        1957.66          43.41
      2621         0.8564        1901.00        1949.90          43.60
      2622         0.8567        1875.00        1946.08          43.30
      2623         0.8570        1927.00        1945.56          43.90
      2624         0.8572        1858.00        1947.58          43.10
      2625         0.8575        1927.00        1949.74          43.90
      2626         0.8578        1892.00        1953.84          43.50
      2627         0.8580        1849.00        1957.79          43.00
      2628         0.8583        1918.00        1961.65          43.79
      2629         0.8586        1892.00        1965.35          43.50
      2630         0.8588        1936.00        1968.46          44.00
      2631         0.8591        1866.00        1973.13          43.20
      2632         0.8594        1910.00        1980.22          43.70
      2633         0.8596        1901.00        1986.41          43.60
      2634         0.8599        1936.00        1994.49          44.00
      2635         0.8602        1927.00        2003.25          43.90
      2636         0.8604        1989.00        2011.87          44.60
      2637         0.8607        2016.00        2019.05          44.90
      2638         0.8610        2025.00        2023.15          45.00
      2639         0.8613        2098.00        2024.06          45.80
      2640         0.8615        2007.00        2021.84          44.80
      2641         0.8618        2016.00        2016.67          44.90
      2642         0.8621        2052.00        2010.24          45.30
      2643         0.8623        2007.00        2003.92          44.80
      2644         0.8626        2034.00        1998.64          45.10
      2645         0.8629        2007.00        1994.79          44.80
      2646         0.8631        1989.00        1992.74          44.60
      2647         0.8634        1980.00        1990.88          44.50
      2648         0.8637        1989.00        1989.39          44.60
      2649         0.8639        2016.00        1988.09          44.90
      2650         0.8642        2007.00        1987.22          44.80
      2651         0.8645        1971.00        1987.27          44.40
      2652         0.8647        2061.00        1988.61          45.40
      2653         0.8650        2098.00        1991.49          45.80
      2654         0.8653        2153.00        1995.70          46.40
      2655         0.8655        2079.00        2000.23          45.60
      2656         0.8658        2034.00        2004.37          45.10
      2657         0.8661        2088.00        2007.94          45.69
      2658         0.8663        2070.00        2013.48          45.50
      2659         0.8666        2107.00        2014.54          45.90
      2660         0.8669        2070.00        2014.58          45.50
      2661         0.8671        2052.00        2013.40          45.30
      2662         0.8674        2125.00        2010.27          46.10
      2663         0.8677        2007.00        2005.49          44.80
      2664         0.8680        2070.00        1998.76          45.50
      2665         0.8682        2016.00        1990.63          44.90
      2666         0.8685        1989.00        1982.20          44.60
      2667         0.8688        1998.00        1974.24          44.70
      2668         0.8690        2098.00        1968.37          45.80
      2669         0.8693        2034.00        1964.89          45.10
      2670         0.8696        1980.00        1963.79          44.50
      2671         0.8698        1998.00        1965.37          44.70
      2672         0.8701        2025.00        1968.83          45.00
      2673         0.8704        2043.00        1974.04          45.20
      2674         0.8706        1936.00        1980.78          44.00
      2675         0.8709        1989.00        1988.82          44.60
      2676         0.8712        1989.00        1998.41          44.60
      2677         0.8714        2043.00        2008.87          45.20
      2678         0.8717        1954.00        2021.44          44.20
      2679         0.8720        1989.00        2035.69          44.60
      2680         0.8722        2016.00        2052.40          44.90
      2681         0.8725        2007.00        2068.39          44.80
      2682         0.8728        2034.00        2083.66          45.10
      2683         0.8730        2088.00        2096.58          45.69
      2684         0.8733        2116.00        2106.36          46.00
      2685         0.8736        2079.00        2111.86          45.60
      2686         0.8738        2052.00        2112.66          45.30
      2687         0.8741        2016.00        2111.84          44.90
      2688         0.8744        2088.00        2109.22          45.69
      2689         0.8746        2016.00        2105.32          44.90
      2690         0.8749        2088.00        2100.54          45.69
      2691         0.8752        2079.00        2094.60          45.60
      2692         0.8754        2061.00        2086.50          45.40
      2693         0.8757        2007.00        2075.74          44.80
      2694         0.8760        2007.00        2061.18          44.80
      2695         0.8762        2034.00        2043.22          45.10
      2696         0.8765        1989.00        2021.14          44.60
      2697         0.8768        2034.00        1996.41          45.10
      2698         0.8770        1927.00        1969.44          43.90
      2699         0.8773        1989.00        1941.42          44.60
      2700         0.8776        1971.00        1913.28          44.40
      2701         0.8778        1910.00        1886.01          43.70
      2702         0.8781        1892.00        1860.21          43.50
      2703         0.8784        1832.00        1836.01          42.80
      2704         0.8786        1901.00        1814.97          43.60
      2705         0.8789        1789.00        1796.29          42.30
      2706         0.8792        1849.00        1781.18          43.00
      2707         0.8794        1840.00        1769.36          42.90
      2708         0.8797        1781.00        1762.38          42.20
      2709         0.8800        1832.00        1760.38          42.80
      2710         0.8802        1858.00        1763.52          43.10
      2711         0.8805        1901.00        1770.25          43.60
      2712         0.8808        1798.00        1780.29          42.40
      2713         0.8810        1849.00        1792.87          43.00
      2714         0.8813        1971.00        1807.13          44.40
      2715         0.8816        1892.00        1821.29          43.50
      2716         0.8818        1832.00        1835.46          42.80
      2717         0.8821        1892.00        1850.06          43.50
      2718         0.8824        1962.00        1864.20          44.29
      2719         0.8826        1971.00        1877.01          44.40
      2720         0.8829        1936.00        1887.72          44.00
      2721         0.8832        1892.00        1895.24          43.50
      2722         0.8834        1945.00        1898.46          44.10
      2723         0.8837        1858.00        1898.61          43.10
      2724         0.8840        1901.00        1893.48          43.60
      2725         0.8842        1927.00        1885.38          43.90
      2726         0.8845        1866.00        1876.57          43.20
      2727         0.8848        1884.00        1867.90          43.41
      2728         0.8850        1962.00        1860.22          44.29
      2729         0.8853        1998.00        1853.53          44.70
      2730         0.8856        1823.00        1847.19          42.70
      2731         0.8858        1840.00        1840.55          42.90
      2732         0.8861        1875.00        1833.01          43.30
      2733         0.8864        1832.00        1823.71          42.80
      2734         0.8866        1832.00        1815.23          42.80
      2735         0.8869        1815.00        1807.72          42.60
      2736         0.8872        1815.00        1802.43          42.60
      2737         0.8874        1789.00        1800.16          42.30
      2738         0.8877        1756.00        1800.18          41.90
      2739         0.8880        1739.00        1803.68          41.70
      2740         0.8882        1739.00        1808.99          41.70
      2741         0.8885        1781.00        1813.46          42.20
      2742         0.8888        1722.00        1815.13          41.50
      2743         0.8890        1731.00        1814.45          41.61
      2744         0.8893        1681.00        1810.30          41.00
      2745         0.8896        1706.00        1803.30          41.30
      2746         0.8898        1648.00        1794.33          40.60
      2747         0.8901        1656.00        1784.25          40.69
      2748         0.8904        1665.00        1774.37          40.80
      2749         0.8906        1616.00        1765.16          40.20
      2750         0.8909        1673.00        1754.75          40.90
      2751         0.8911        1608.00        1743.95          40.10
      2752         0.8914        1624.00        1730.50          40.30
      2753         0.8917        1568.00        1714.47          39.60
      2754         0.8919        1537.00        1696.51          39.20
      2755         0.8922        1544.00        1677.00          39.29
      2756         0.8925        1521.00        1656.65          39.00
      2757         0.8927        1529.00        1635.75          39.10
      2758         0.8930        1505.00        1615.91          38.79
      2759         0.8933        1444.00        1596.87          38.00
      2760         0.8935        1467.00        1578.89          38.30
      2761         0.8938        1475.00        1561.98          38.41
      2762         0.8941        1444.00        1546.63          38.00
      2763         0.8943        1459.00        1532.88          38.20
      2764         0.8946        1406.00        1520.39          37.50
      2765         0.8949        1490.00        1510.86          38.60
      2766         0.8951        1391.00        1503.96          37.30
      2767         0.8954        1436.00        1499.85          37.89
      2768         0.8957        1490.00        1499.02          38.60
      2769         0.8959        1459.00        1500.95          38.20
      2770         0.8962        1482.00        1505.51          38.50
      2771         0.8965        1436.00        1513.16          37.89
      2772         0.8967        1429.00        1522.65          37.80
      2773         0.8970        1429.00        1533.72          37.80
      2774         0.8973        1421.00        1544.91          37.70
      2775         0.8975        1406.00        1554.85          37.50
      2776         0.8978        1482.00        1562.58          38.50
      2777         0.8980        1529.00        1567.63          39.10
      2778         0.8983        1459.00        1568.23          38.20
      2779         0.8986        1521.00        1565.86          39.00
      2780         0.8988        1498.00        1560.94          38.70
      2781         0.8991        1505.00        1553.79          38.79
      2782         0.8994        1529.00        1544.87          39.10
      2783         0.8996        1490.00        1534.56          38.60
      2784         0.8999        1521.00        1522.88          39.00
      2785         0.9002        1560.00        1510.20          39.50
      2786         0.9004        1505.00        1497.05          38.79
      2787         0.9007        1552.00        1484.51          39.40
      2788         0.9010        1544.00        1472.11          39.29
      2789         0.9012        1490.00        1460.81          38.60
      2790         0.9015        1467.00        1451.07          38.30
      2791         0.9018        1498.00        1443.13          38.70
      2792         0.9020        1521.00        1438.45          39.00
      2793         0.9023        1521.00        1432.74          39.00
      2794         0.9025        1498.00        1428.78          38.70
      2795         0.9028        1467.00        1425.28          38.30
      2796         0.9031        1529.00        1421.56          39.10
      2797         0.9033        1513.00        1418.65          38.90
      2798         0.9036        1521.00        1416.38          39.00
      2799         0.9039        1568.00        1414.57          39.60
      2800         0.9041        1529.00        1415.36          39.10
      2801         0.9044        1498.00        1418.06          38.70
      2802         0.9047        1513.00        1425.14          38.90
      2803         0.9049        1498.00        1433.38          38.70
      2804         0.9052        1529.00        1443.97          39.10
      2805         0.9055        1482.00        1456.16          38.50
      2806         0.9057        1498.00        1469.91          38.70
      2807         0.9060        1505.00        1483.92          38.79
      2808         0.9062        1505.00        1496.63          38.79
      2809         0.9065        1513.00        1507.60          38.90
      2810         0.9068        1552.00        1515.21          39.40
      2811         0.9070        1459.00        1519.20          38.20
      2812         0.9073        1475.00        1519.30          38.41
      2813         0.9076        1459.00        1516.01          38.20
      2814         0.9078        1475.00        1510.62          38.41
      2815         0.9081        1521.00        1503.36          39.00
      2816         0.9084        1537.00        1494.76          39.20
      2817         0.9086        1490.00        1485.15          38.60
      2818         0.9089        1467.00        1474.69          38.30
      2819         0.9092        1444.00        1463.09          38.00
      2820         0.9094        1406.00        1451.39          37.50
      2821         0.9097        1467.00        1440.55          38.30
      2822         0.9099        1459.00        1429.00          38.20
      2823         0.9102        1490.00        1418.06          38.60
      2824         0.9105        1436.00        1409.56          37.89
      2825         0.9107        1399.00        1402.35          37.40
      2826         0.9110        1467.00        1397.25          38.30
      2827         0.9113        1399.00        1394.69          37.40
      2828         0.9115        1444.00        1394.69          38.00
      2829         0.9118        1467.00        1397.09          38.30
      2830         0.9121        1421.00        1401.47          37.70
      2831         0.9123        1399.00        1407.35          37.40
      2832         0.9126        1452.00        1413.96          38.11
      2833         0.9128        1467.00        1420.93          38.30
      2834         0.9131        1436.00        1427.17          37.89
      2835         0.9134        1513.00        1432.14          38.90
      2836         0.9136        1429.00        1435.81          37.80
      2837         0.9139        1490.00        1438.16          38.60
      2838         0.9142        1444.00        1439.37          38.00
      2839         0.9144        1421.00        1439.54          37.70
      2840         0.9147        1429.00        1438.73          37.80
      2841         0.9150        1475.00        1436.59          38.41
      2842         0.9152        1429.00        1433.54          37.80
      2843         0.9155        1444.00        1429.24          38.00
      2844         0.9157        1452.00        1423.71          38.11
      2845         0.9160        1475.00        1416.99          38.41
      2846         0.9163        1490.00        1412.09          38.60
      2847         0.9165        1444.00        1404.10          38.00
      2848         0.9168        1490.00        1395.21          38.60
      2849         0.9171        1429.00        1386.71          37.80
      2850         0.9173        1490.00        1378.18          38.60
      2851         0.9176        1505.00        1369.53          38.79
      2852         0.9178        1421.00        1361.73          37.70
      2853         0.9181        1452.00        1355.00          38.11
      2854         0.9184        1505.00        1349.12          38.79
      2855         0.9186        1498.00        1344.16          38.70
      2856         0.9189        1490.00        1339.90          38.60
      2857         0.9192        1521.00        1336.90          39.00
      2858         0.9194        1576.00        1335.04          39.70
      2859         0.9197        1544.00        1334.24          39.29
      2860         0.9200        1498.00        1335.35          38.70
      2861         0.9202        1513.00        1337.73          38.90
      2862         0.9205        1452.00        1342.96          38.11
      2863         0.9207        1513.00        1350.58          38.90
      2864         0.9210        1521.00        1360.66          39.00
      2865         0.9213        1521.00        1373.04          39.00
      2866         0.9215        1568.00        1387.32          39.60
      2867         0.9218        1529.00        1402.70          39.10
      2868         0.9221        1513.00        1420.03          38.90
      2869         0.9223        1576.00        1435.60          39.70
      2870         0.9226        1624.00        1449.09          40.30
      2871         0.9228        1624.00        1462.17          40.30
      2872         0.9231        1552.00        1473.01          39.40
      2873         0.9234        1616.00        1482.07          40.20
      2874         0.9236        1656.00        1489.27          40.69
      2875         0.9239        1632.00        1495.17          40.40
      2876         0.9242        1600.00        1499.90          40.00
      2877         0.9244        1689.00        1503.67          41.10
      2878         0.9247        1681.00        1508.53          41.00
      2879         0.9249        1624.00        1512.01          40.30
      2880         0.9252        1648.00        1515.84          40.60
      2881         0.9255        1632.00        1519.60          40.40
      2882         0.9257        1681.00        1523.20          41.00
      2883         0.9260        1640.00        1526.46          40.50
      2884         0.9263        1640.00        1529.21          40.50
      2885         0.9265        1624.00        1530.97          40.30
      2886         0.9268        1608.00        1531.82          40.10
      2887         0.9270        1656.00        1531.50          40.69
      2888         0.9273        1656.00        1530.03          40.69
      2889         0.9276        1592.00        1527.65          39.90
      2890         0.9278        1600.00        1524.65          40.00
      2891         0.9281        1568.00        1521.69          39.60
      2892         0.9284        1656.00        1518.33          40.69
      2893         0.9286        1592.00        1515.25          39.90
      2894         0.9289        1576.00        1512.34          39.70
      2895         0.9291        1584.00        1509.60          39.80
      2896         0.9294        1505.00        1506.91          38.79
      2897         0.9297        1624.00        1504.35          40.30
      2898         0.9299        1568.00        1501.70          39.60
      2899         0.9302        1560.00        1501.84          39.50
      2900         0.9305        1537.00        1500.27          39.20
      2901         0.9307        1568.00        1499.06          39.60
      2902         0.9310        1560.00        1498.47          39.50
      2903         0.9312        1544.00        1498.83          39.29
      2904         0.9315        1616.00        1500.27          40.20
      2905         0.9318        1576.00        1503.05          39.70
      2906         0.9320        1568.00        1507.73          39.60
      2907         0.9323        1544.00        1513.89          39.29
      2908         0.9325        1529.00        1522.35          39.10
      2909         0.9328        1552.00        1532.95          39.40
      2910         0.9331        1576.00        1546.08          39.70
      2911         0.9333        1624.00        1561.60          40.30
      2912         0.9336        1608.00        1579.42          40.10
      2913         0.9339        1624.00        1598.47          40.30
      2914         0.9341        1600.00        1619.26          40.00
      2915         0.9344        1616.00        1640.36          40.20
      2916         0.9346        1616.00        1660.81          40.20
      2917         0.9349        1681.00        1679.89          41.00
      2918         0.9352        1640.00        1696.71          40.50
      2919         0.9354        1681.00        1711.27          41.00
      2920         0.9357        1697.00        1723.43          41.19
      2921         0.9359        1706.00        1734.29          41.30
      2922         0.9362        1722.00        1740.65          41.50
      2923         0.9365        1648.00        1744.31          40.60
      2924         0.9367        1747.00        1744.83          41.80
      2925         0.9370        1714.00        1742.09          41.40
      2926         0.9373        1706.00        1736.22          41.30
      2927         0.9375        1689.00        1727.45          41.10
      2928         0.9378        1632.00        1716.25          40.40
      2929         0.9380        1697.00        1703.90          41.19
      2930         0.9383        1689.00        1690.13          41.10
      2931         0.9386        1706.00        1675.89          41.30
      2932         0.9388        1624.00        1662.05          40.30
      2933         0.9391        1665.00        1649.04          40.80
      2934         0.9393        1624.00        1637.39          40.30
      2935         0.9396        1552.00        1627.57          39.40
      2936         0.9399        1592.00        1620.00          39.90
      2937         0.9401        1537.00        1614.91          39.20
      2938         0.9404        1624.00        1612.55          40.30
      2939         0.9407        1600.00        1612.54          40.00
      2940         0.9409        1600.00        1614.67          40.00
      2941         0.9412        1656.00        1618.35          40.69
      2942         0.9414        1624.00        1623.50          40.30
      2943         0.9417        1576.00        1629.32          39.70
      2944         0.9420        1624.00        1635.65          40.30
      2945         0.9422        1640.00        1641.35          40.50
      2946         0.9425        1592.00        1646.51          39.90
      2947         0.9427        1739.00        1651.02          41.70
      2948         0.9430        1731.00        1654.84          41.61
      2949         0.9433        1731.00        1658.03          41.61
      2950         0.9435        1722.00        1660.66          41.50
      2951         0.9438        1714.00        1663.18          41.40
      2952         0.9440        1739.00        1665.71          41.70
      2953         0.9443        1624.00        1668.49          40.30
      2954         0.9446        1722.00        1671.60          41.50
      2955         0.9448        1697.00        1675.57          41.19
      2956         0.9451        1739.00        1680.56          41.70
      2957         0.9453        1764.00        1687.06          42.00
      2958         0.9456        1689.00        1694.91          41.10
      2959         0.9459        1739.00        1704.48          41.70
      2960         0.9461        1731.00        1715.59          41.61
      2961         0.9464        1832.00        1728.24          42.80
      2962         0.9466        1832.00        1741.75          42.80
      2963         0.9469        1798.00        1755.69          42.40
      2964         0.9472        1789.00        1769.18          42.30
      2965         0.9474        1823.00        1781.36          42.70
      2966         0.9477        1815.00        1791.57          42.60
      2967         0.9480        1823.00        1799.79          42.70
      2968         0.9482        1823.00        1804.89          42.70
      2969         0.9485        1875.00        1808.41          43.30
      2970         0.9487        1866.00        1808.46          43.20
      2971         0.9490        1823.00        1806.52          42.70
      2972         0.9493        1823.00        1802.53          42.70
      2973         0.9495        1910.00        1796.86          43.70
      2974         0.9498        1849.00        1789.58          43.00
      2975         0.9500        1840.00        1780.85          42.90
      2976         0.9503        1772.00        1770.78          42.10
      2977         0.9506        1739.00        1761.50          41.70
      2978         0.9508        1739.00        1750.07          41.70
      2979         0.9511        1858.00        1738.65          43.10
      2980         0.9513        1756.00        1727.96          41.90
      2981         0.9516        1806.00        1718.51          42.50
      2982         0.9519        1772.00        1711.34          42.10
      2983         0.9521        1681.00        1706.18          41.00
      2984         0.9524        1731.00        1703.73          41.61
      2985         0.9526        1781.00        1704.21          42.20
      2986         0.9529        1756.00        1707.42          41.90
      2987         0.9532        1714.00        1713.32          41.40
      2988         0.9534        1756.00        1721.02          41.90
      2989         0.9537        1689.00        1729.47          41.10
      2990         0.9539        1722.00        1737.43          41.50
      2991         0.9542        1681.00        1743.90          41.00
      2992         0.9545        1706.00        1747.75          41.30
      2993         0.9547        1756.00        1748.25          41.90
      2994         0.9550        1648.00        1747.15          40.60
      2995         0.9552        1722.00        1743.66          41.50
      2996         0.9555        1656.00        1738.86          40.69
      2997         0.9558        1706.00        1733.57          41.30
      2998         0.9560        1681.00        1727.41          41.00
      2999         0.9563        1681.00        1720.79          41.00
      3000         0.9565        1608.00        1713.57          40.10
      3001         0.9568        1624.00        1705.57          40.30
      3002         0.9571        1640.00        1696.51          40.50
      3003         0.9573        1568.00        1686.42          39.60
      3004         0.9576        1576.00        1675.56          39.70
      3005         0.9578        1600.00        1663.85          40.00
      3006         0.9581        1544.00        1651.46          39.29
      3007         0.9583        1529.00        1638.55          39.10
      3008         0.9586        1521.00        1625.43          39.00
      3009         0.9589        1521.00        1612.29          39.00
      3010         0.9591        1568.00        1599.43          39.60
      3011         0.9594        1560.00        1587.25          39.50
      3012         0.9596        1552.00        1575.80          39.40
      3013         0.9599        1467.00        1565.08          38.30
      3014         0.9602        1552.00        1555.22          39.40
      3015         0.9604        1513.00        1546.30          38.90
      3016         0.9607        1505.00        1537.96          38.79
      3017         0.9609        1552.00        1530.40          39.40
      3018         0.9612        1513.00        1523.67          38.90
      3019         0.9615        1505.00        1517.84          38.79
      3020         0.9617        1513.00        1513.02          38.90
      3021         0.9620        1544.00        1509.44          39.29
      3022         0.9622        1521.00        1507.05          39.00
      3023         0.9625        1498.00        1505.76          38.70
      3024         0.9628        1354.00        1505.29          36.80
      3025         0.9630        1467.00        1505.90          38.30
      3026         0.9633        1490.00        1507.17          38.60
      3027         0.9635        1482.00        1510.70          38.50
      3028         0.9638        1498.00        1512.86          38.70
      3029         0.9641        1608.00        1515.08          40.10
      3030         0.9643        1505.00        1517.76          38.79
      3031         0.9646        1521.00        1520.78          39.00
      3032         0.9648        1552.00        1524.05          39.40
      3033         0.9651        1529.00        1529.31          39.10
      3034         0.9653        1467.00        1532.73          38.30
      3035         0.9656        1513.00        1536.20          38.90
      3036         0.9659        1498.00        1539.80          38.70
      3037         0.9661        1521.00        1543.01          39.00
      3038         0.9664        1592.00        1546.48          39.90
      3039         0.9666        1505.00        1549.28          38.79
      3040         0.9669        1608.00        1553.31          40.10
      3041         0.9672        1624.00        1557.68          40.30
      3042         0.9674        1624.00        1562.67          40.30
      3043         0.9677        1640.00        1568.15          40.50
      3044         0.9679        1584.00        1573.90          39.80
      3045         0.9682        1624.00        1579.66          40.30
      3046         0.9684        1656.00        1586.85          40.69
      3047         0.9687        1665.00        1592.08          40.80
      3048         0.9690        1648.00        1597.21          40.60
      3049         0.9692        1722.00        1601.84          41.50
      3050         0.9695        1731.00        1607.13          41.61
      3051         0.9697        1706.00        1612.94          41.30
      3052         0.9700        1747.00        1619.74          41.80
      3053         0.9703        1731.00        1627.61          41.61
      3054         0.9705        1739.00        1636.64          41.70
      3055         0.9708        1798.00        1646.64          42.40
      3056         0.9710        1747.00        1657.61          41.80
      3057         0.9713        1739.00        1669.15          41.70
      3058         0.9715        1756.00        1681.16          41.90
      3059         0.9718        1798.00        1693.65          42.40
      3060         0.9721        1781.00        1706.83          42.20
      3061         0.9723        1840.00        1721.01          42.90
      3062         0.9726        1832.00        1736.37          42.80
      3063         0.9728        1866.00        1752.78          43.20
      3064         0.9731        1962.00        1770.37          44.29
      3065         0.9734        1849.00        1788.84          43.00
      3066         0.9736        1918.00        1808.15          43.79
      3067         0.9739        1945.00        1827.49          44.10
      3068         0.9741        1936.00        1848.71          44.00
      3069         0.9744        1971.00        1867.54          44.40
      3070         0.9746        2061.00        1885.47          45.40
      3071         0.9749        1936.00        1902.08          44.00
      3072         0.9752        1980.00        1917.43          44.50
      3073         0.9754        1954.00        1931.07          44.20
      3074         0.9757        2007.00        1942.22          44.80
      3075         0.9759        2016.00        1950.70          44.90
      3076         0.9762        2025.00        1956.23          45.00
      3077         0.9765        2043.00        1958.15          45.20
      3078         0.9767        2107.00        1956.14          45.90
      3079         0.9770        2061.00        1949.78          45.40
      3080         0.9772        2079.00        1939.27          45.60
      3081         0.9775        1989.00        1924.65          44.60
      3082         0.9777        2007.00        1906.65          44.80
      3083         0.9780        1954.00        1886.23          44.20
      3084         0.9783        1945.00        1863.82          44.10
      3085         0.9785        1962.00        1840.05          44.29
      3086         0.9788        1936.00        1816.18          44.00
      3087         0.9790        1927.00        1792.18          43.90
      3088         0.9793        1936.00        1768.75          44.00
      3089         0.9795        1806.00        1745.55          42.50
      3090         0.9798        1815.00        1723.49          42.60
      3091         0.9801        1772.00        1702.65          42.10
      3092         0.9803        1840.00        1682.98          42.90
      3093         0.9806        1781.00        1664.85          42.20
      3094         0.9808        1866.00        1649.64          43.20
      3095         0.9811        1714.00        1635.59          41.40
      3096         0.9813        1706.00        1623.44          41.30
      3097         0.9816        1706.00        1613.41          41.30
      3098         0.9819        1706.00        1605.27          41.30
      3099         0.9821        1640.00        1598.91          40.50
      3100         0.9824        1616.00        1594.52          40.20
      3101         0.9826        1747.00        1591.57          41.80
      3102         0.9829        1714.00        1590.20          41.40
      3103         0.9831        1681.00        1590.15          41.00
      3104         0.9834        1697.00        1590.97          41.19
      3105         0.9837        1673.00        1593.22          40.90
      3106         0.9839        1560.00        1596.60          39.50
      3107         0.9842        1576.00        1601.28          39.70
      3108         0.9844        1632.00        1607.34          40.40
      3109         0.9847        1665.00        1615.08          40.80
      3110         0.9849        1592.00        1625.88          39.90
      3111         0.9852        1616.00        1637.51          40.20
      3112         0.9855        1656.00        1651.62          40.69
      3113         0.9857        1689.00        1669.21          41.10
      3114         0.9860        1656.00        1689.02          40.69
      3115         0.9862        1665.00        1712.38          40.80
      3116         0.9865        1706.00        1739.37          41.30
      3117         0.9867        1689.00        1770.22          41.10
      3118         0.9870        1697.00        1804.66          41.19
      3119         0.9873        1815.00        1842.38          42.60
      3120         0.9875        1823.00        1882.52          42.70
      3121         0.9878        1823.00        1925.59          42.70
      3122         0.9880        1892.00        1966.02          43.50
      3123         0.9883        1866.00        2004.48          43.20
      3124         0.9885        1858.00        2039.89          43.10
      3125         0.9888        1927.00        2071.69          43.90
      3126         0.9891        1954.00        2099.77          44.20
      3127         0.9893        2043.00        2124.56          45.20
      3128         0.9896        2025.00        2146.50          45.00
      3129         0.9898        1989.00        2166.30          44.60
      3130         0.9901        2025.00        2184.59          45.00
      3131         0.9903        2052.00        2203.21          45.30
      3132         0.9906        2070.00        2219.16          45.50
      3133         0.9909        2098.00        2233.97          45.80
      3134         0.9911        2218.00        2247.74          47.10
      3135         0.9914        2237.00        2260.26          47.30
      3136         0.9916        2237.00        2271.56          47.30
      3137         0.9919        2134.00        2281.50          46.20
      3138         0.9921        2209.00        2290.21          47.00
      3139         0.9924        2294.00        2297.81          47.90
      3140         0.9926        2237.00        2304.47          47.30
      3141         0.9929        2314.00        2310.73          48.10
      3142         0.9932        2294.00        2316.66          47.90
      3143         0.9934        2352.00        2322.42          48.50
      3144         0.9937        2430.00        2329.16          49.29
      3145         0.9939        2421.00        2336.93          49.20
      3146         0.9942        2490.00        2346.07          49.90
      3147         0.9944        2333.00        2356.81          48.30
      3148         0.9947        2411.00        2369.35          49.10
      3149         0.9950        2381.00        2383.65          48.80
      3150         0.9952        2323.00        2400.46          48.20
      3151         0.9955           0.00           0.00           0.00
#ENDCIF
